1 **Comparison of linear combination modeling strategies for GABA-edited MRS**  
2 **at 3T**

3 Helge J. Zöllner<sup>1,2</sup>, Sofie Tapper<sup>1,2</sup>, Steve C. N. Hui<sup>1,2</sup>, Peter B. Barker<sup>1,2</sup>, Richard A. E. Edden<sup>1,2</sup>,

4 Georg Oeltzschner<sup>1,2,\*</sup>

5 *<sup>1</sup> Russell H. Morgan Department of Radiology and Radiological Science, The Johns Hopkins*

6 *University School of Medicine, Baltimore, MD, United States*

7 *<sup>2</sup> F. M. Kirby Research Center for Functional Brain Imaging, Kennedy Krieger Institute, Balti-*

8 *more, MD, United States*

9

10 **\*Corresponding author:**

11 Georg Oeltzschner, Ph.D.

12 Division of Neuroradiology, Park 367G

13 The Johns Hopkins University School of Medicine

14 600 N Wolfe St

15 Baltimore, MD 21287

16 [goeltzsl@jhmi.edu](mailto:goeltzsl@jhmi.edu)

17

18

19 *Running title: Linear combination modeling of GABA-edited MRS*

20 *Word count: 7239*

## 21 Graphical Abstract

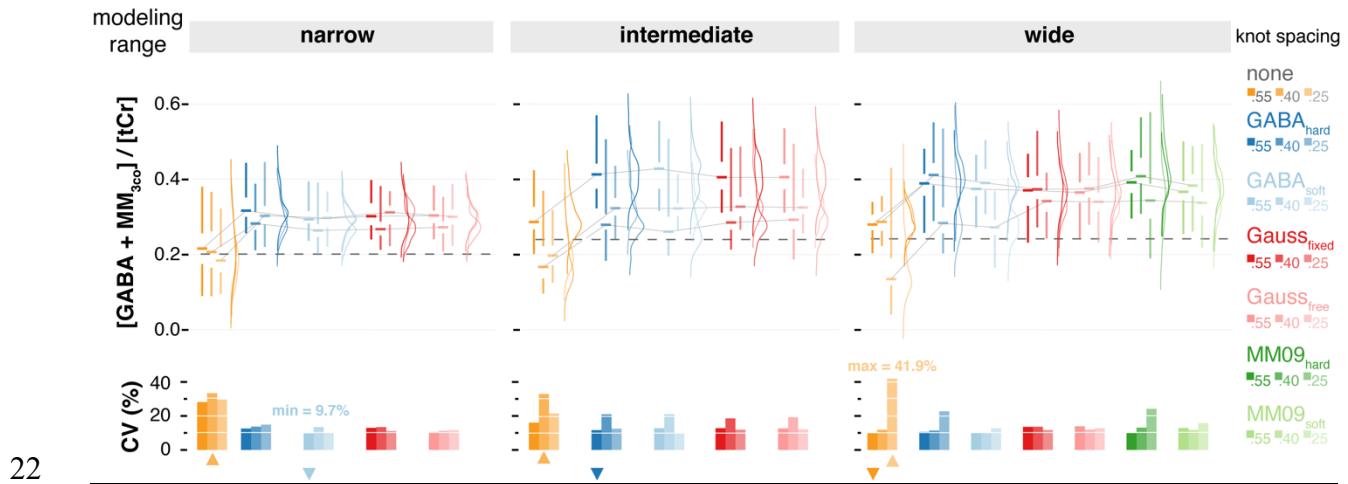

23 102 strategies to model GABA-edited MRS with linear combination  
24 modeling were evaluated to quantify GABA and GABA+ in Osprey.  
25 Significantly different GABA and GABA+ estimates were found when a  
26 well-parameterized macro-molecule at 3 ppm was included. The  
27 findings suggest that linear combination modeling needs to be adapted  
28 for quantification of GABA-edited MRS.

29

## 30 **Abbreviations**

31  $\gamma$ -aminobutyric-acid – GABA; Linear combination modeling – LCM; macromolecule – MM;  
32 GABA + MM - GABA+; homocarnosine – HCar; glutamate – Glu; glutamine – Gln; glutathione  
33 – GSH; N-acetylaspartylglutamate – NAAG; N-acetylaspartate – NAA; Hankel singular value  
34 decomposition – HSVD; full-width at half-maximum – FWHM; creatine – Cr; negative creatine  
35 methylene – -CrCH<sub>2</sub>; phosphocreatine – PCr; SD – standard deviation; Akaike Information Cri-  
36 terion – AIC; coefficients of variation – CVs;

37

38

39 **Keywords**

- 40           • Magnetic resonance spectroscopy
- 41           • Linear combination modeling
- 42           • GABA-edited MEGA-PRESS

## 43 Abstract

### 44 Purpose

45 J-difference-edited spectroscopy is a valuable approach for the in vivo detection of  $\gamma$ -aminobu-  
46 tyric-acid (GABA) with MRS. A recent expert consensus article recommends linear combination  
47 modeling (LCM) of edited MRS, but does not give specific details of implementation. This  
48 study explores different modeling strategies to adapt LCM for GABA-edited MRS.

### 49 Methods

50 61 medial parietal lobe GABA-edited MEGA-PRESS spectra from a recent 3T multi-site study  
51 were modeled using 102 different strategies combining six different approaches to account for  
52 co-edited macromolecules, three modeling ranges, three baseline knot spacings, and the use of  
53 basis sets with or without homocarnosine. The resulting GABA and GABA+ estimates (quanti-  
54 fied relative to total creatine), the residuals at different ranges, SDs and CVs, and Akaike infor-  
55 mation criteria, were used to evaluate the models' performance.

### 56 Results

57 Significantly different GABA+ and GABA estimates were found when a well-parameterized  
58 MM<sub>3co</sub> basis function was included in the model. The mean GABA estimates were significantly  
59 lower when modeling MM, while the CVs were similar. A sparser spline knot spacing led to  
60 lower variation in the GABA and GABA+ estimates, and a narrower modeling range – only in-  
61 cluding the signals of interest – did not substantially improve or degrade modeling performance.  
62 Additionally, results suggest that LCM can separate GABA and the underlying co-edited MM<sub>3co</sub>.  
63 Incorporating homocarnosine into the modeling did not significantly improve variance in  
64 GABA+ estimates.

### 66 Conclusion

67 GABA-edited MRS is most appropriately quantified by LCM with a well-parameterized co-ed-  
68 ited MM<sub>3co</sub> basis function with a constraint to the non-overlapped MM<sub>0,93</sub>, in combination with a  
69 sparse spline knot spacing and a modeling range between 0.5 and 4 ppm.

## 70 Introduction

71 A recent expert consensus paper recommended that linear combination modeling (LCM) should  
72 be used for the quantification of edited MRS data<sup>1</sup>, stating that standard fitting approaches origi-  
73 nally optimized for short-TE MRS should be adapted for edited MRS. Further, it was recom-  
74 mended that quantum-mechanical simulations should be used to confirm the co-edited profile of  
75 all metabolites in the edited spectrum, and contributions from macromolecule (MM) signals  
76 should be specified. Despite these recommendations, little detail was given regarding several  
77 unique features of edited spectra, and how they should be appropriately modeled. These features  
78 include:

- 79
- 80 1) The MEGA-PRESS experiment is well-known to co-edit MM signals with coupled spins  
81 at 1.7 and 3 ppm, causing substantial contamination of the edited GABA signal, and  
82 forcing researchers to report the composite measure GABA+MM (GABA+)<sup>1</sup>. Because  
83 the co-edited MM signal is poorly characterized, there is currently no consensus or  
84 recommendation on how to appropriately account for it during spectral modeling.  
85 Instead, the most widely used analysis algorithms implement entirely different strategies  
86 to fit the composite 3-ppm signal. For example, the Gannet software uses a single  
87 Gaussian model<sup>2</sup>, while a double-Gaussian is used in Tarquin<sup>3</sup>, and LCModel<sup>4</sup> defaults to  
88 a basis set that only includes the GABA basis function.
  - 89 2) Another co-edited compound contributing to the 3 ppm signal is homocarnosine (HCar),  
90 a dipeptide of GABA and histidine. While the 3 ppm multiplets of GABA and  
91 homocarnosine are separated by just 0.05 ppm (which are therefore unlikely to be  
92 successfully separated), inclusion of a homocarnosine basis function may be warranted  
93 based on its reported concentration in vivo (~0.5 mmol/kg<sup>5</sup>, compared to ~1-2 mmol/kg  
94 for GABA), but it has not been investigated whether doing so has a stabilizing or  
95 destabilizing effect on the modeling<sup>6</sup>.
  - 96 3) Unedited spectra are typically modeled over a restricted frequency-domain range  
97 covering the visible upfield peaks, including macromolecular and lipid resonances  
98 between 0 and 1 ppm, but usually avoiding the water suppression window above ~4 ppm.  
99 The choice of frequency-domain modeling range for edited spectra is less obvious. Since

100 the main advantage of spectral editing is the isolation of a single target resonance,  
101 modeling signals outside the immediate surrounding of the target may dilute the resolving  
102 power of editing. On the other hand, increasing the modeling range may offer useful  
103 constraints to stabilize the solution of the modeling problem. The difference is  
104 highlighted by the different strategies encountered in common software tools – while the  
105 Gannet software fits the GABA-edited difference spectrum over a narrow range (only  
106 including the 3-ppm GABA+ and 3.75 ppm glutamate and glutamine peaks), the  
107 LCModel recommendation is to include the strong co-edited signals from glutamate  
108 (Glu), glutamine (Gln), glutathione (GSH), N-acetylaspartylglutamate (NAAG), and N-  
109 acetylaspartate (NAA), which heavily overlap with GABA around 2.25 ppm. The effects  
110 of limiting the modeling range have not been assessed systematically to date.

111 4) Linear combination modeling methods commonly include terms to account for smooth  
112 baseline curvature, usually parametrized from cubic B-spline or polynomial functions, or  
113 by smoothing residuals. The flexibility of the baseline model substantially affects  
114 metabolite estimates from unedited spectra<sup>7</sup>; while baseline terms are necessary to  
115 account for e.g. lipid contamination, poor water suppression etc., they are potential  
116 sources of overfitting if awarded too many degrees of freedom. Baseline modeling may  
117 have an even greater influence when modeling difference spectra, since only *co-edited*  
118 lipid and MM signals contribute to the smooth background variation. Importantly, the co-  
119 edited MM background of the GABA-edited difference spectrum has not been  
120 appropriately characterized (e.g., through metabolite-nulled acquisition), suggesting that  
121 the choice of baseline flexibility can drastically influence modeling results through two  
122 highly susceptible regions of the spectrum. First, in the absence of an appropriate model  
123 for the co-edited broad MM signal at 3 ppm, this signal may be absorbed into the baseline  
124 depending on its flexibility. Second, strong MM and lipid signals in the region between  
125 0.5 and 2.5 ppm may be affected by the 1.9 ppm editing pulse (either directly through  
126 saturation or indirectly through coupling), likely leading to an unknown, but substantial,  
127 MM contribution in this spectral region<sup>8,9</sup>. This is especially important considering that  
128 the co-edited signals from NAA, NAAG, Glu, Gln, and GSH overlap with GABA in this  
129 region. Overly rigid baselines may provide insufficient flexibility to capture these signals,  
130 in turn compromising the accuracy of the estimation of the co-edited metabolites.

131 The aim of this study was to evaluate different strategies for linear combination modeling of  
132 GABA-edited MEGA-PRESS difference spectra, and to establish initial ‘best practices’ substan-  
133 tiating the recommendations of the expert consensus on spectral editing. To this end, different  
134 approaches to account for co-edited MM signals, various modeling ranges and baseline knot  
135 spacings, as well as the inclusion of homocarnosine were compared. In the absence of a ‘gold  
136 standard’, the performance of each modeling strategy was assessed by comparing descriptive sta-  
137 tistics of the metabolite estimates, calculating the Akaike information criteria, and assessing the  
138 fit residuals.



## 139 **Methods**

### 140 Study participants & data acquisition

141 In this study, 61 publicly available GABA-edited MEGA-PRESS datasets originating from 7  
142 sites from a recent 3T multi-center study<sup>10</sup> were analyzed (see **Supplementary Material 1** for  
143 subject list). All datasets were acquired on Philips 3T scanners with the following acquisition pa-  
144 rameters: TR/TE = 2000/68 ms; 320 excitations (10m 40s scan time); 16-step phase-cycle; 2 kHz  
145 spectral width; 2000 samples; 27-ml cubic voxel volume in the medial parietal lobe. For this heu-  
146 ristic approach of exploring the GABA modeling the data homogeneity (SNR, FWHM, tissue  
147 composition, and absence of fat contamination) was increased while reducing the overall number  
148 of subjects by including only 61/298 subjects of the original dataset<sup>10</sup>. All sites except for P8  
149 used a similar sequence implementation with interleaved water referencing for prospective fre-  
150 quency correction<sup>11</sup>. For the edit-ON transients, the editing pulses with 15 ms pulse duration and  
151 82.5 Hz inversion bandwidth (FHWM) were applied at a frequency of 1.9 ppm to refocus the  
152 coupling evolution of the GABA spin system. For the edit-OFF transients, the editing pulses  
153 were applied at a frequency of 7.5 ppm. Edit-ON and edit-OFF transients were acquired in alter-  
154 nating order. An additional water reference scan was acquired for each dataset using interleaved  
155 water referencing<sup>11</sup>, i.e. one excitation with water suppression and editing pulses deactivated  
156 every 40 water-suppressed excitations (total of 8 averages).

157

### 158 Data pre-processing

159 Data were analyzed in MATLAB using Osprey<sup>12,13</sup> (v.1.0.1.1), a recently published open-source  
160 MRS analysis toolbox. Raw data were eddy-current-corrected<sup>14</sup> based on the water reference,  
161 and individual transients were aligned separately within the edit-ON and edit-OFF conditions us-  
162 ing the robust spectral registration algorithm<sup>15</sup>. Averaged edit-ON and edit-OFF spectra were  
163 aligned by optimizing relative frequency and phase such that the water signal in the difference  
164 spectrum was minimized. The final difference spectra for quantification were generated by sub-  
165 tracting the edit-OFF from the edit-ON spectra. Finally, any residual water signal was removed  
166 with a Hankel singular value decomposition (HSVD) filter<sup>16</sup> to improve data quality in the edit-  
167 OFF spectra and to reduce residual baseline roll in the difference spectra.

168

169 Basis set

170 The basis set used for modeling was generated from a fully localized 2D density-matrix simula-  
171 tion of a 101 x 101 spatial grid (voxel size: 30 mm x 30 mm x 30 mm; field of view: 45 mm x 45  
172 mm x 45 mm) implemented in a MATLAB based simulation toolbox FID-A<sup>17</sup>, using vendor-  
173 specific refocusing pulse shape and duration, sequence timings, and phase cycling. It contains 17  
174 metabolite basis functions (ascorbate, aspartate, creatine (Cr), negative creatine methylene (-  
175 CrCH<sub>2</sub>), GABA, glycerophosphocholine, GSH, Gln, Glu, water, myo-inositol, lactate, NAA,  
176 NAAG, phosphocholine, phosphocreatine (PCr), phosphoethanolamine, scyllo-inositol, and tau-  
177 rine) and 8 Gaussian MM and lipid resonances (MM<sub>0.94</sub>, MM<sub>1.22</sub>, MM<sub>1.43</sub>, MM<sub>1.70</sub>, MM<sub>2.05</sub>,  
178 Lip09, Lip13, Lip20, details in **Supplementary Material 2** with similarly defined parametriza-  
179 tion as described in the LCMoel software manual<sup>18</sup>) for the edit-OFF spectrum.

180  
181 For the difference spectrum, MM<sub>0.94</sub> and the co-edited macromolecular signal at 3 ppm (MM<sub>3co</sub>)  
182 were parametrized as Gaussian basis functions (MM<sub>0.94</sub>: 3-proton signal; chemical shift 0.915  
183 ppm, full-width at half-maximum (FWHM) 11 Hz; MM<sub>3co</sub>: 2-proton signal; chemical shift 3  
184 ppm; FWHM 14 Hz). The MM<sub>3co</sub> amplitude was defined under the assumptions of a pseudo-dou-  
185 blet GABA signal at 3 ppm and the MM<sub>3co</sub> contribution to the 3-ppm GABA peak to be around  
186 50%<sup>1,6,8,19</sup>. The optimum FWHM used to parametrize the MM<sub>3co</sub> basis function was determined  
187 to be 14 Hz by fitting the mean difference spectrum of all datasets with a composite GABA+ ba-  
188 sis function (GABA + MM<sub>3co</sub>) with varying FWHM (between 1 and 20 Hz). The parameterized  
189 Gaussian MM<sub>3co</sub> basis function was integrated into the modeling process using different assump-  
190 tions and constraints described in the following paragraphs.

191  
192 Linear combination modeling of GABA-edited difference spectra

193  
194 Osprey's frequency-domain linear combination model was used to determine the metabolite esti-  
195 mates. Model parameters include metabolite basis function amplitudes, frequency shifts,  
196 zero/first order phase correction, Gaussian and Lorentzian linebroadening, and cubic spline base-  
197 line coefficients. All parameters are determined by Levenberg-Marquardt<sup>20,21</sup> non-linear least-  
198 squares optimization, using a non-negative least-squares (NNLS) fit<sup>22-24</sup> to determine the metab-  
199 olite amplitudes and baseline coefficients at each iteration of the non-linear optimization.

200 Amplitude ratio soft constraints are imposed on MM and lipid amplitudes, as well as selected  
 201 pairs of metabolite amplitudes, as defined in the LCMModel manual<sup>4,18</sup>. The strength factor of the  
 202 amplitude ratio soft constraint  $\lambda$  is set to 0.05 by default.

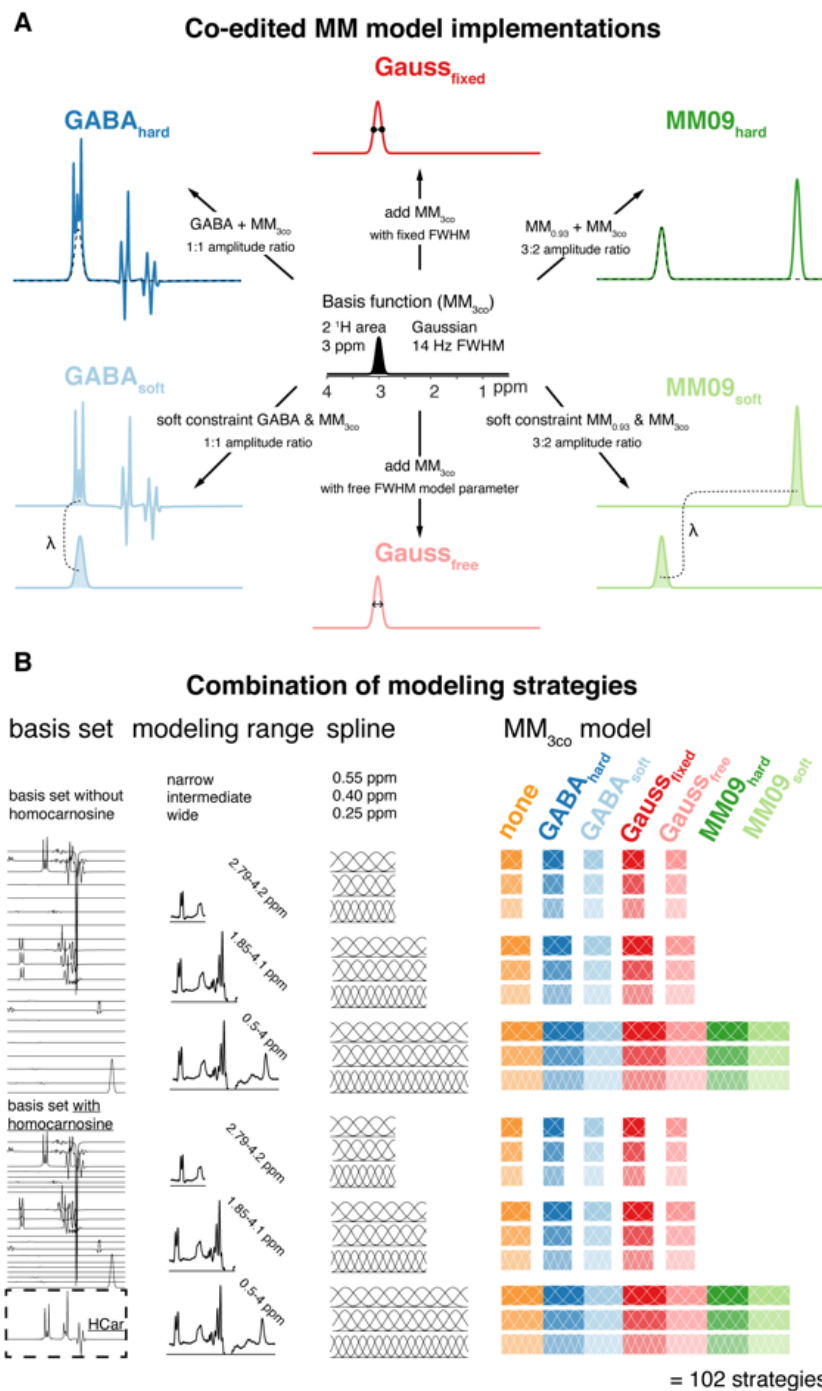

Figure 1 – Different linear combination modeling strategies for GABA-edited spectra. (A) Different co-edited MM<sub>3co</sub> modeling approaches derived from a Gaussian function at 3.0 ppm (B)

*All combinations of basis set composition, modeling range, spline knot spacing, and MM<sub>3co</sub> modeling leading to 102 different modeling strategies.*

203 A range of modeling strategies for the GABA-edited difference spectrum was included in this  
204 study, covering various aspects of the modeling process (**Figure 1**). The different parametriza-  
205 tions and soft constraints to account for the co-edited MM<sub>3co</sub> signal are shown in **Figure 1A**. All  
206 possible combinations for the modeling strategies: i) inclusion of homocarnosine in the basis set;  
207 ii) different parametrizations and soft constraints to account for the co-edited MM<sub>3co</sub> signal; iii)  
208 different modeling ranges and iv) different baseline spline knot spacings are tabulated graph-  
209 ically in **Figure 1 B**. Each modeling aspect is described in detail below:

210

#### 211 *Including homocarnosine in the basis set*

212 To assess the effects of including homocarnosine in the linear combination model, we repeated  
213 all analysis steps with two different basis sets: the default Osprey basis set *with* and *without* an  
214 additional HCar basis function. Chemical shift and scalar coupling parameters describing the  
215 HCar spin system were taken from literature<sup>6</sup>.

216

#### 217 *Varying the modeling range and baseline knot spacing*

218 Two aspects of linear combination modeling are suggested to have a considerable influence on  
219 metabolite estimates<sup>7,25</sup>. First, the choice of the modeling range, i.e., the frequency interval that  
220 defines the part of the frequency-domain spectrum that is considered to calculate the least-  
221 squares difference between model and data. Second, the baseline knot spacing, i.e., the frequency  
222 difference between two adjacent knots of the cubic spline basis that is used to approximate the  
223 smooth baseline.

224

225 Three different modeling range scenarios were considered, reflecting common choices in the lit-  
226 erature and widely used software tools: a) a wide modeling range typically used to analyze uned-  
227 ited spectra, including all signals in the GABA-edited difference spectrum (0.5 to 4 ppm –  
228 “wide”); b) an intermediate modeling range excluding signals below 1.9 ppm (e.g. co-edited li-  
229 pids and macromolecules), but including strong co-edited signals from NAA, NAAG, Glu, Gln,  
230 and GSH (1.85 and 4.1 ppm, “intermediate”), similar to the range recommended in LCMoDel’s  
231 dedicated ‘mega-press-3’ option; and c) a narrow modeling range only including the co-edited

232 signals from GABA+ and Glx (2.79 – 4.2 ppm, "narrow"), the default modeling range in Gan-  
233 net<sup>2</sup>.

234

235 Three spline knot spacings were included in the analysis, with 0.4 ppm being the default Osprey  
236 option, shown to create reproducible and comparable metabolite estimates for conventional MRS  
237 <sup>26</sup>, as well as sparser (0.55 ppm) and denser (0.25 ppm) spline knot spacings.

238

239

#### 240 Co-edited macromolecule models

241 Seven different strategies to model the GABA-edited difference spectrum were implemented  
242 (**Figure 1 A**). The trivial approach – not accounting for the co-edited signal MM<sub>3co</sub> at all – is la-  
243 beled **none**. The other six modeling strategies all include a dedicated parametrized Gaussian  
244 MM<sub>3co</sub> basis function. This basis function is given different degrees of freedom in the different  
245 strategies, e.g. hard- or soft-constrained relative to the amplitude of the GABA or the MM<sub>0.94</sub> ba-  
246 sis functions, and with a fixed or free width. Here, strategies with fewer degrees of freedom re-  
247 flect the frequently made assumption that the GABA-to-MM ratio (and the MM background it-  
248 self) is relatively stable across subjects and anatomical region, and assumed to be known, while  
249 strategies with more degrees of freedom or soft constraints relax these assumptions:

- 250 • The **GABA<sub>hard</sub>** model uses a single composite GABA+MM basis function by adding the  
251 GABA and MM<sub>3co</sub> (initial FWHM of the basis function = 14 Hz) basis functions with a fixed  
252 1:1 amplitude ratio. The 1:1 ratio reflects the widely used empirical assumption that 50% of  
253 the 3-ppm signal in a conventional GABA-edited difference spectrum can be attributed to co-  
254 edited macromolecules<sup>6,19</sup>.
- 255 • The **GABA<sub>soft</sub>** model uses separate GABA and MM<sub>3co</sub> (initial FWHM of the basis function =  
256 14 Hz) basis functions and imposes a soft constraint on the ration of the amplitudes of both  
257 basis functions during the optimization (1:1 ratio).
- 258 • The **Gauss<sub>fixed</sub>** model uses separate GABA and MM<sub>3co</sub> (initial FWHM of the basis function =  
259 14 Hz) basis functions. No further constraints are imposed. This means possible changes in  
260 the contributions to the 3-ppm GABA peak are modeled.
- 261 • The **Gauss<sub>free</sub>** model uses separate GABA and MM<sub>3co</sub> basis functions. In contrast to the  
262 Gauss<sub>fixed</sub> model, the FWHM of the Gaussian MM<sub>3co</sub> signal is represented by an additional

263 model parameter. This means that the  $MM_{3co}$  basis function itself is not static, but  
264 dynamically modified during optimization.

- 265 • The  $MM09_{hard}$  model uses separate GABA and MM basis functions. The  $MM_{3co}$  basis  
266 function is replaced by a composite  $MM_{0.94} + MM_{3co}$  basis function (i.e., the  $MM_{0.94}$  (initial  
267 FWHM of the basis function = 11 Hz) and  $MM_{3co}$  (initial FWHM of the basis function = 14  
268 Hz) basis functions are added in a 3:2 ratio). Resulting in a single composite basis function  
269 for  $MM_{0.94}$  and  $MM_{3co}$ , adapted from the soft constraint model described in literature <sup>9</sup>.
- 270 • The  $MM09_{soft}$  model uses separate GABA,  $MM_{0.94}$  and  $MM_{3co}$  basis functions. In contrast to  
271 the  $MM09_{hard}$  model, soft constraints enforce a ~3:2 amplitude ratio for the  $MM_{0.94}$  and  
272  $MM_{3co}$  amplitudes during optimization. Resulting in two separate basis functions for  $MM_{0.94}$   
273 and  $MM_{3co}$ , which is similar to previously described implementations <sup>9</sup>.

274 The models  $MM09_{hard}$  and  $MM09_{soft}$  <sup>27</sup> as well as  $Gauss_{fixed}$  <sup>28</sup> correspond to models previously  
275 investigated using the LCMModel software and the amplitude assumptions were derived empiri-  
276 cally. It is worth noting that each basis function receives a separate Lorentzian linebroadening,  
277 frequency shift, and amplitude parameter during the optimization. For the  $Gauss_{free}$  model, the  
278  $MM_{3co}$  basis function is dynamically updated as an explicit modeling parameter during the opti-  
279 mization, therefore the  $MM_{3co}$  basis function has effectively two separate parameters to account  
280 for its linewidth (the Lorentzian linebroadening term and the FWHM of the  $MM_{3co}$  basis func-  
281 tion). Finally, the composite models ( $GABA_{hard}$ ), which do not have separate GABA and MM  
282 functions, only have one linebroadening, one frequency, and one amplitude parameter compared  
283 to twice the parameters for the soft constraint counterparts.

284  
285 Combining the various  $MM_{3co}$  models (5 + 2 that were used for the wide modeling range only),  
286 modeling ranges (3), baseline spline knot spacings (3), and basis sets (2), a total of 102 different  
287 modeling strategies were investigated in this study. All models were implemented in Osprey<sup>12</sup>  
288 and are available on GitHub<sup>13</sup>.

289

## 290 Quantification, visualization, and statistics

### 291 Quantification

292 For the basis set without homocarnosine, GABA refers to the model amplitude estimate for the  
293 GABA basis function, which is of course only available for the modeling strategies with separate  
294 basis functions for GABA and MM<sub>3co</sub> (none, GABA<sub>soft</sub>, Gauss<sub>fixed</sub>, Gauss<sub>free</sub>, MM09<sub>soft</sub>). GABA+  
295 refers to the sum of the amplitude estimates for GABA and MM<sub>3co</sub> (GABA<sub>soft</sub>, Gauss<sub>fixed</sub>, Gauss-  
296 <sub>free</sub>, MM09<sub>hard</sub>, MM09<sub>soft</sub>) or the amplitude estimate for the composite basis function including  
297 both MM and GABA (GABA<sub>hard</sub>) and is therefore calculated for all strategies with an explicit  
298 MM<sub>3co</sub> model. For comparison, the GABA amplitude for the 'none' strategy is included in the  
299 figures reporting GABA + MM<sub>3co</sub>. However, it still refers to a GABA-only estimate.

300 For the basis set that included homocarnosine (HCar), the difference in GABA and MM<sub>3co</sub> esti-  
301 mates between the modeling strategies with and without HCar ( $\Delta$ GABA and  $\Delta$ MM<sub>3co</sub>, respec-  
302 tively) were investigated to evaluate whether the inclusion of HCar has a systematic effect on the  
303 estimation of those signals with which it overlaps. All estimates were quantified relative to the  
304 total creatine (Cr + PCr) amplitude from the edit-OFF spectrum with the wide modeling range  
305 and a spline knot spacing of 0.4 ppm. Differences in GABA(+)/tCr between modeling strategies  
306 are therefore only related to the modeling of the difference spectra, but not to the reference com-  
307 pound modeling. No further tissue or relaxation corrections were applied.

308 Further, the relative contributions of MM<sub>3co</sub> to the GABA+ estimate and the relative contribu-  
309 tions of HCar to the sum of GABA+ and HCar estimate were calculated.

310

### 311 Visualization

312 The modeling performance and systematic characteristics of each modeling strategy were visu-  
313 ally assessed through the mean spectra, mean fit, mean residual, and mean models of GABA+,  
314 GABA, MM<sub>3co</sub>, HCar (if included) and the baseline, i.e., averaged across all datasets.

315

316 The metabolite estimate distributions were visualized as violin plots including boxplots with me-  
317 dian, 25<sup>th</sup>/75<sup>th</sup> quartile ranges, and smoothed distributions to identify systematic differences be-  
318 tween modeling strategies. In addition, the mean value of the 'none' model across the three  
319 spline knot spacings was added for each modeling range as a dashed horizontal line. Bar plots

320 were created to visualize quality metrics, including the standard deviation if appropriate. All  
321 plots were generated with R<sup>29</sup> (Version 3.6.1) in RStudio (Version 1.2.5019, RStudio Inc.) using  
322 SpecVis<sup>26,30</sup>, an open-source package to visualize linear combination modeling results with the  
323 ggplot2 package<sup>31</sup>. All scripts and results are publicly available<sup>32</sup>.

324

### 325 Statistics

326 Significant differences in the mean and the variance of the GABA, GABA+, and MM<sub>3co</sub> esti-  
327 mates were assessed between all modeling strategies. The statistical tests were set up as paired  
328 without any further inference. Differences of variances were tested with Fligner-Killeen's test,  
329 with a post-hoc pair-wise Bonferroni-corrected Fligner-Killeen's test. The means were compared  
330 with an ANOVA or a Welch's ANOVA, depending on whether variances were different or not.  
331 Post-hoc analysis was performed with a paired t-test with equal or non-equal variances, respec-  
332 tively.

333

334 Additionally, Pearson's correlation was used to investigate the impact of including HCar in the  
335 basis set. The strength of the correlation was considered substantial for  $R > 0.25$ .

### 336 Model evaluation criteria

337 The performance of each modeling strategy was evaluated in different ways, including the im-  
338 pact of the different modeling strategies on the GABA, GABA+ , and MM<sub>3co</sub> estimates, as well  
339 as several quality measures:

- 340 1) Visual inspection: Mean model, residual, and baseline were assessed for characteristic  
341 features.
- 342 2) SD fit quality: The SD of the residual was determined, and then normalized by the noise  
343 level (calculated as the SD of the noise between -2 and 0 ppm). This is done over the  
344 entire modeling range of the difference spectrum and termed **residual<sub>SD</sub> range**.
- 345 3) Amplitude fit quality: the difference between the maximum and minimum of the residual  
346 was determined, and then normalized by the noise level <sup>25</sup> (similarly calculated as in the  
347 second criterion). This was done over the entire modeling range of the difference  
348 spectrum and termed **residual<sub>ampl</sub> range**.



- 349 4) Amplitude 3-ppm peak fit quality: Similar to the third criterion, the residual was  
350 calculated over the range of  $3.027 \pm 0.15$  ppm to assess the fit quality of the 3-ppm  
351 GABA peak and termed **residual<sub>ampl 3ppm</sub>**.
- 352 5) Consistency of metabolite estimates: The across-subject coefficients of variation (CV =  
353 SD/mean) for all metabolite estimates (GABA/tCr, GABA+/tCr) were calculated for each  
354 modeling strategy.
- 355 6) Akaike Information Criterion (AIC): The Akaike information criterion <sup>33</sup>, which takes the  
356 number of model parameters into account, is defined as follows:

357 
$$\logLikelihood_i = -0.5 * N_i * (\log(2 * \pi) + 1 - \log(N_i) + \log(SSE_i))$$

358

359 
$$AIC_i = -2 * \frac{1}{N_i} * \logLikelihood_i + 2K_i$$

360 Here,  $N_i$  is the number of points in the modeling strategy  $i$ ,  $SSE_i$  is the sum of squared  
361 error (i.e., squared residual) of that strategy, and  $K_i$  is the number of free model param-  
362 eters for that strategy. The  $\logLikelihood_i$  was divided by the number of points  $N_i$  to  
363 reduce the strong weighting of the datapoints and to make the  $AIC_i$  values comparable  
364 for different modeling ranges. Soft constraint model parameters were included with a  
365 value of 0.5. Lower  $AIC_i$  values indicate a more appropriate model. Subsequently,  $\Delta AIC_i$   
366 scores were calculated as the difference of  $AIC_i$  of modeling strategy  $i$  and the model  
367 with the lowest  $AIC_{min}$ :

368 
$$\Delta AIC_i = AIC_i - AIC_{min}$$

369

## 370 **Results**

371 All 61 datasets were successfully processed and modeled with all 102 modeling strategies. No  
372 data were excluded from further analysis. The data quality assessment indicated consistently  
373 high spectral quality for all spectra ( $NAA_{SNR} = 272 \pm 70$ ;  $NAA_{FWHM} = 5.29 \pm 1.09$  Hz) without  
374 lipid contamination (data overview in **Supplementary Material 4**). Other data quality measures  
375 were extracted from the Gannet<sup>2</sup> analysis performed in recent multi-site studies<sup>10,34</sup>. For the  
376 Philips-only subset of datasets in the present study, the tissue composition ( $fGM = 0.60 \pm 0.04$ ;  
377  $fWM = 0.27 \pm 0.03$ ;  $fCSF = 0.13 \pm 0.04$ ) and across-subject CV ( $GABA+/Cr = 9.99\%$ ) indicate  
378 consistency in the dataset and the modeling. across-subject CV was interpreted as a measure of  
379 modeling performance, assuming that increased CVs are mainly introduced by variability in the  
380 modeling and do not reflect biologically meaningful variance of GABA+ estimates.

### 381 **Summary and visual inspection of the modeling results**

382

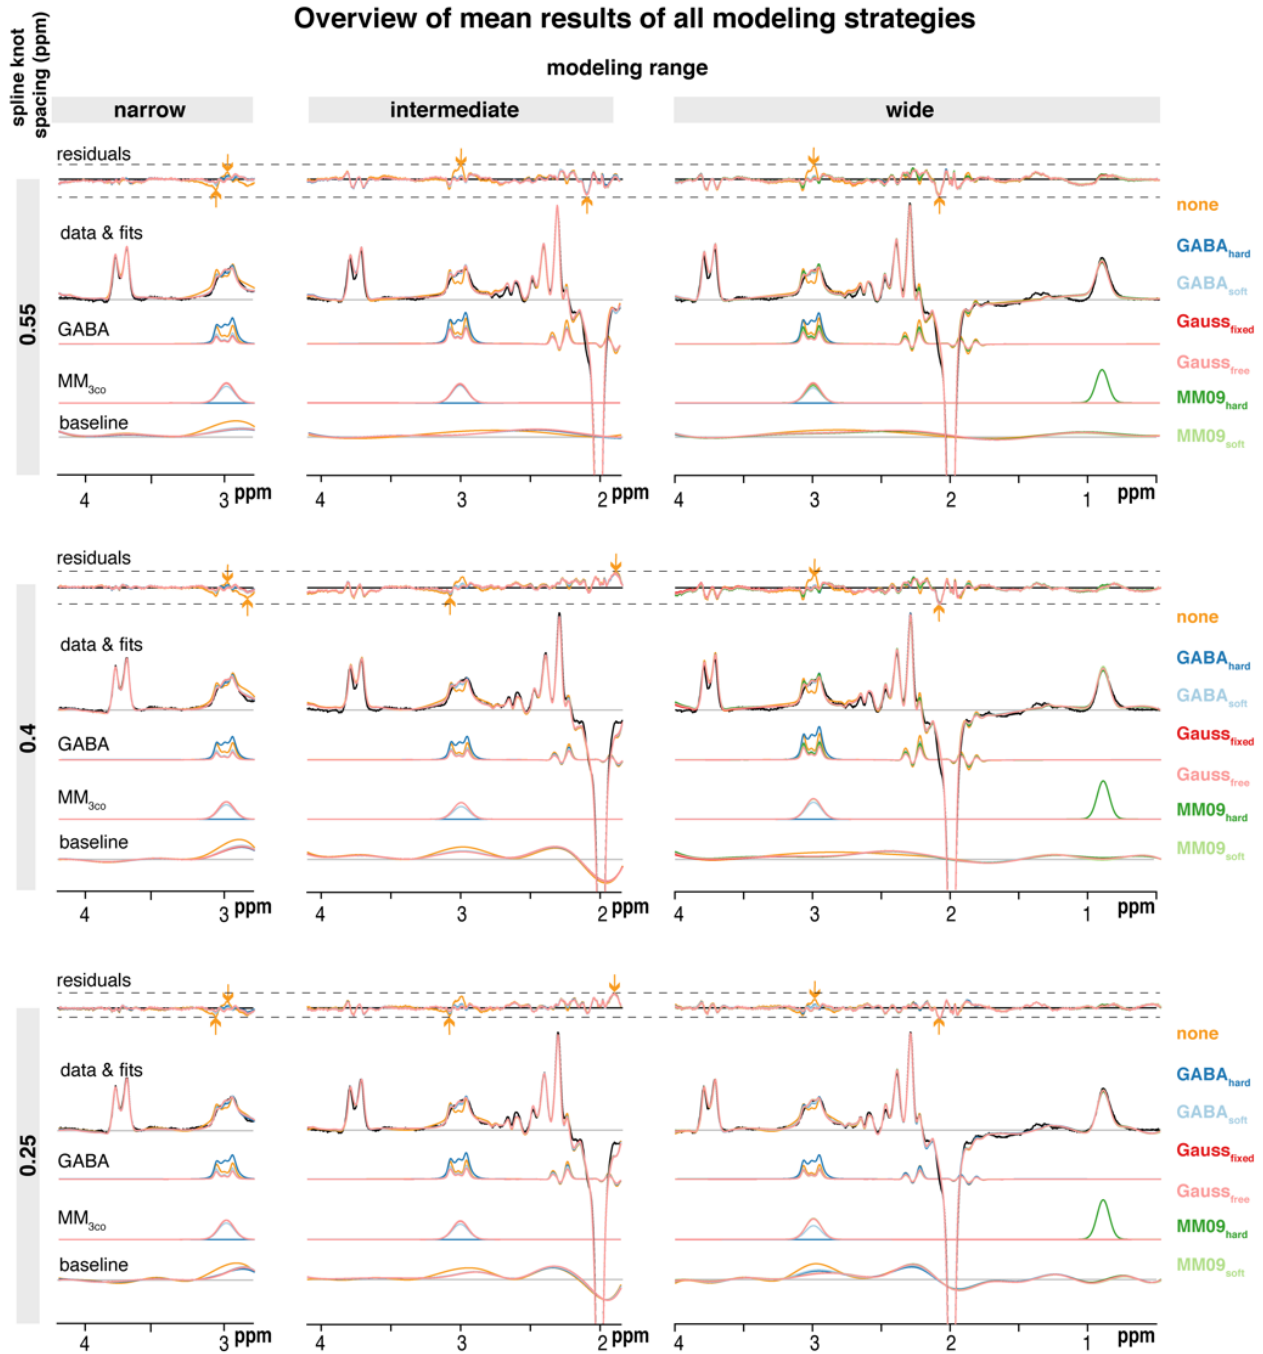

383

Figure 2 – Mean modeling results for all modeling strategies without homocarnosine. A substantial structured residual is apparent at 3 ppm if no MM modeling strategy is included. All three modeling ranges (columns), three spline knot spacings (rows), and MM<sub>3co</sub> model (color-coded) are presented with mean residuals and fits, as well as the GABA+, GABA, MM<sub>3co</sub>, and spline baseline models. The mean data is included in black. The dashed lines indicate the range of the residual across one row. The arrows indicate the range of values for a specific modeling range and spline knot spacing with the color corresponding to the MM<sub>3co</sub> model with minimum/maximum value.

384  
385 **Figure 2** shows the mean modeling results for all modeling strategies without homocarnosine.  
386 Not including  $MM_{3co}$  leads to a substantial structured residual around 3 ppm for all knot spacings  
387 and modeling ranges. In contrast, all modeling strategies with  $MM_{3co}$  appear to reflect the line-  
388 shape of the 3-ppm signal more accurately, with very similar results for the complete fit (metabo-  
389 lites, MMs, and baseline) and the individual components. Modeling strategies with the interme-  
390 diate and wide modeling range further show strong residuals around 2 ppm, suggesting slightly  
391 inaccurate lineshape modeling of the methyl singlets from NAA and NAAG, or inaccurate mod-  
392 eling of co-edited MM signals in this region. Structured residuals appear also in the region of the  
393 3.75 ppm Glx signals, although they are much less pronounced in strategies with the narrow  
394 modeling range, suggesting that including the 2.25 ppm multiplets (and underlying baseline fluc-  
395 tuation) has a considerable impact on phase estimation.  
396 In general, the residuals are consistent between different  $MM_{3co}$  models for any given knot spac-  
397 ing and modeling range. Notably, residuals tend to be smaller on an absolute scale for denser  
398 knot spacing and narrower modeling range.  
399 Mean GABA models agree well between all strategies with a separate  $MM_{3co}$  model. The  
400  $GABA_{hard}$  strategy appears to produce a larger signal as its GABA basis function includes the  
401  $MM_{3co}$  signal, but does not model it separately, while the strategies that do so produce compara-  
402 ble mean  $MM_{3co}$  models.  
403 The mean baseline is consistently flatter around 3 ppm for modeling strategies with an explicit  
404  $MM_{3co}$  model, while absorbing substantially more signal for the ‘none’ approach without an MM  
405 model. This behavior is particularly obvious for the dense knot spacing (0.25 ppm) over the wide  
406 modeling range. Baseline curvature generally increases for denser knot spacings around 2.2 ppm  
407 for the intermediate and wide range.  
408

409 **Metabolite level distribution**

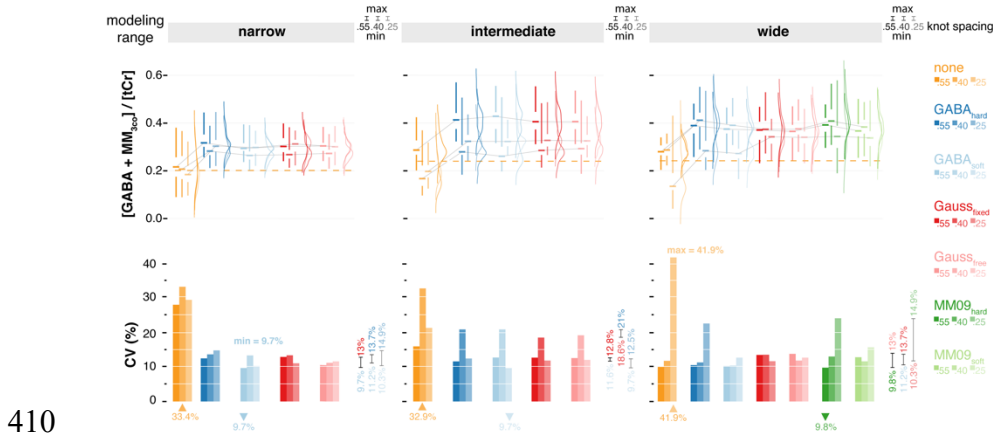

410 **Figure 3** – Distribution and across subject coefficients of variation (CVs) of GABA+ estimates for all modeling strategies. Including a MM<sub>3co</sub> model significantly increases the mean estimates for all modeling strategies, while giving similar or reduced CVs. The mean estimates across the three spline knot spacings of the ‘none’ approach are indicated as a dashed line for each modeling range. All three modeling ranges (column) and three spline knot spacings (within each column), and co-edited MM models (color-coded) are presented. Distributions are shown as half-violins (smoothed distribution), box plots with median, interquartile range, and 25<sup>th</sup>/75<sup>th</sup> quartile. The median lines of the box plots are connected to visualize trends within a specific baseline knot spacing. CVs are summarized as bar plots. Minimum/maximum CVs for each modeling range are indicated as downwards/upwards triangle in the color corresponding to the MM<sub>3co</sub> model. Minimum/maximum CVs for each baseline knot spacing within a specific modeling range are reported on the right side of each column. Global minimum and maximum CVs across all models are added as text.

411 **Figure 3** shows distributions and coefficients of variation (CVs) of the GABA+ estimates for all  
 412 modeling strategies. Table 1 summarizes the mean and SD GABA/GABA+ estimates as well as  
 413 the statistics. GABA+ estimates are significantly higher than GABA-only estimates of the ‘none’  
 414 modeling strategy for all modeling ranges and knot spacings, supporting the notion from **Figure**  
 415 **2** that not including an MM model leaves a considerable fraction of the edited 3-ppm signal un-  
 416 modeled, resulting in substantial residuals or increased baseline amplitude flexion.  
 417 Notably, all modeling strategies with MM<sub>3co</sub> return comparable mean estimates and CVs within  
 418 the same knot spacing (see Minimum/Maximum column of **Figure 3**). In addition, sparser knot  
 419 spacing leads to lower CVs. The intermediate modeling range does not appear to perform more  
 420 consistently than both other modeling ranges.

421 **Table 1** – GABA+ mean and SDs for all modeling strategies (ratios to tCr). Significant differences ( $p <$   
 422  $.05$ ) between the corresponding model and the ‘none’ are shaded in gray.

424

| modeling range         |         | narrow |       |       | intermediate |       |       | wide  |       |       |
|------------------------|---------|--------|-------|-------|--------------|-------|-------|-------|-------|-------|
| knot spacing (ppm)     |         | 0.55   | 0.4   | 0.25  | 0.55         | 0.4   | 0.25  | 0.55  | 0.4   | 0.25  |
| none                   | [GABA]  | 0.22   | 0.213 | 0.193 | 0.297        | 0.186 | 0.204 | 0.284 | 0.288 | 0.158 |
|                        |         | .062   | .071  | .057  | .048         | .061  | .044  | .029  | .034  | .066  |
| GABA <sub>hard</sub>   | [GABA+] | 0.328  | 0.291 | 0.312 | 0.414        | 0.296 | 0.329 | 0.389 | 0.414 | 0.3   |
|                        |         | .041   | .04   | .046  | .048         | .062  | .041  | .041  | .047  | .068  |
| GABA <sub>soft</sub>   | [GABA+] | 0.298  | 0.267 | 0.295 | 0.417        | 0.279 | 0.323 | 0.375 | 0.397 | 0.271 |
|                        |         | .029   | .036  | .03   | .053         | .058  | .031  | .039  | .042  | .035  |
| Gauss <sub>fixed</sub> | [GABA+] | 0.306  | 0.272 | 0.304 | 0.412        | 0.298 | 0.332 | 0.369 | 0.382 | 0.343 |
|                        |         | .04    | .037  | .034  | .052         | .055  | .04   | .05   | .052  | .04   |
| Gauss <sub>free</sub>  | [GABA+] | 0.305  | 0.277 | 0.3   | 0.409        | 0.3   | 0.331 | 0.364 | 0.382 | 0.341 |
|                        |         | .032   | .031  | .035  | .052         | .058  | .04   | .05   | .045  | .043  |
| MM09 <sub>hard</sub>   | [GABA+] | -      | -     | -     | -            | -     | -     | 0.396 | 0.422 | 0.345 |
|                        |         |        |       |       |              |       |       | .039  | .055  | .084  |
| MM09 <sub>soft</sub>   | [GABA+] | -      | -     | -     | -            | -     | -     | 0.367 | 0.386 | 0.337 |
|                        |         |        |       |       |              |       |       | .047  | .045  | .053  |

425

426

427

428

429

430

431

432

433

434

435

436

437  
438  
439  
440  
441  
442  
443  
444 Model evaluation

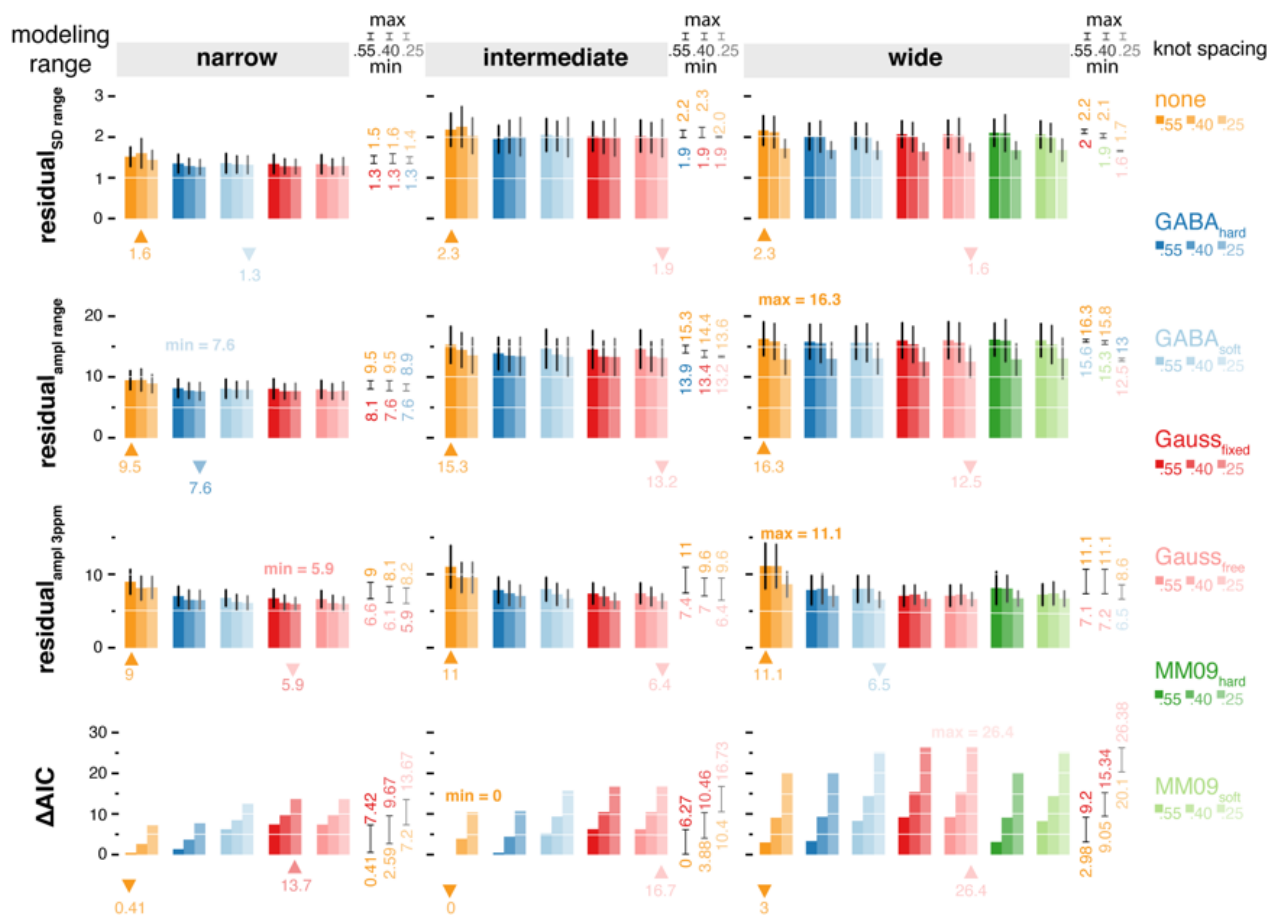

Figure 4 – Evaluation of all modeling strategies. Comparably low residual<sub>ampl</sub> range are related to the high data quality without artifacts between 0.5 and 2 ppm. Including an MM<sub>3co</sub> model reduces the 3-ppm residual by ~30% without significant impact on the ΔAIC. All three modeling ranges (column) and three spline knot spacings (within each column), and co-edited MM models (color-coded) are presented. Bar plots represent mean values; SD is indicated by whiskers where appropriate. Minimum/maximum values for each modeling range are indicated as downwards/upwards triangle in the color corresponding to the MM<sub>3co</sub> model.

*Minimum/maximum values for each baseline knot spacing within a specific modeling range are reported on the right side of each column. Global minimum and maximum values across all models are added as text.*

445 **Figure 4** summarizes the metrics used for model evaluation. The residual over the modeled fre-  
446 quency range ( $\text{residual}_{\text{SD range}}$  and  $\text{residual}_{\text{ampl range}}$ ) is lowest for the narrow modeling range. For  
447 the intermediate and wide modeling ranges,  $\text{residual}_{\text{ampl range}}$  is substantially higher, largely driven  
448 by the 2-ppm region (see also **Figure 2**). Consequentially,  $\text{residual}_{\text{ampl range}}$  is comparable be-  
449 tween MM modeling strategies for a given knot spacing (see Minimum/Maximum column of  
450 **Figure 4**).

451 The residual around the GABA<sup>+</sup> peak ( $\text{residual}_{\text{ampl 3ppm}}$ ) is consistently reduced by up to 30% if a  
452 MM<sub>3co</sub> model is included, in line with the reduction of structured residual in **Figure 2**. This ef-  
453 fect is less pronounced for the dense knot spacing (0.25 ppm), indicating that a flexible baseline  
454 is to some degree capable of accounting for otherwise unmodeled MM signal. Together, these  
455 findings again support the notion that omitting an explicit MM<sub>3co</sub> model does not capture the  
456 whole edited 3-ppm signal, which remains unmodeled (in the residual) or gets partially absorbed  
457 by the baseline or interpreted incorrectly as GABA signal.

458 The strategy with the lowest AIC is the ‘none’ model with the intermediate modeling range and  
459 sparse knot spacing, reflecting the low number of model parameters: there is no separate basis  
460 function for MM, and the low number of splines. The  $\Delta\text{AIC}$  (the difference between the lowest  
461 AIC and the individual model’s AIC) consequently increases for larger modeling ranges, as more  
462 splines are included. Similarly,  $\Delta\text{AIC}$  increases for denser knot spacings, and in fact, this in-  
463 crease is much stronger compared to the resulting reduction in both residual measures, suggest-  
464 ing that the increased flexibility and reduction of the residual does not justify the greater number  
465 of model parameters.

466 For any given knot spacing and modeling range,  $\Delta\text{AIC}$  values are comparable between MM<sub>3co</sub>  
467 models, with moderate increases when more parameters are estimated. Together with its low CV  
468 (9.8% compared to the minimum CV value 9.7% for the GABA<sub>soft</sub> value with a narrow fit range)  
469 for GABA<sup>+</sup>, the  $\Delta\text{AIC}$  for the MM09<sub>hard</sub> model over the wide modeling range with sparse knot  
470 spacing ( $\Delta\text{AIC} = 3.1$ ) indicates a good performance of this particular model without introducing



471 overfitting. Despite the slightly higher  $\Delta\text{AIC}$ , it is beneficial to opt for the  $\text{MM09}_{\text{hard}}$  model,  
472 since the  $\text{MM}_{0.94}$  peak provides an ‘external’, non-overlapped reference anchor point for the am-  
473 plitude of the expected  $\text{MM}_{30}$  peak – the MM landscape is thought to be relatively stable across  
474 healthy subjects in a narrow age range, at least in the absence of pathology <sup>8</sup>. Furthermore, the  
475  $\text{MM09}_{\text{hard}}$  model does not impose any amplitude assumptions or constraints on the target metab-  
476 olite GABA.

477 Separation of GABA and MM<sub>3co</sub>

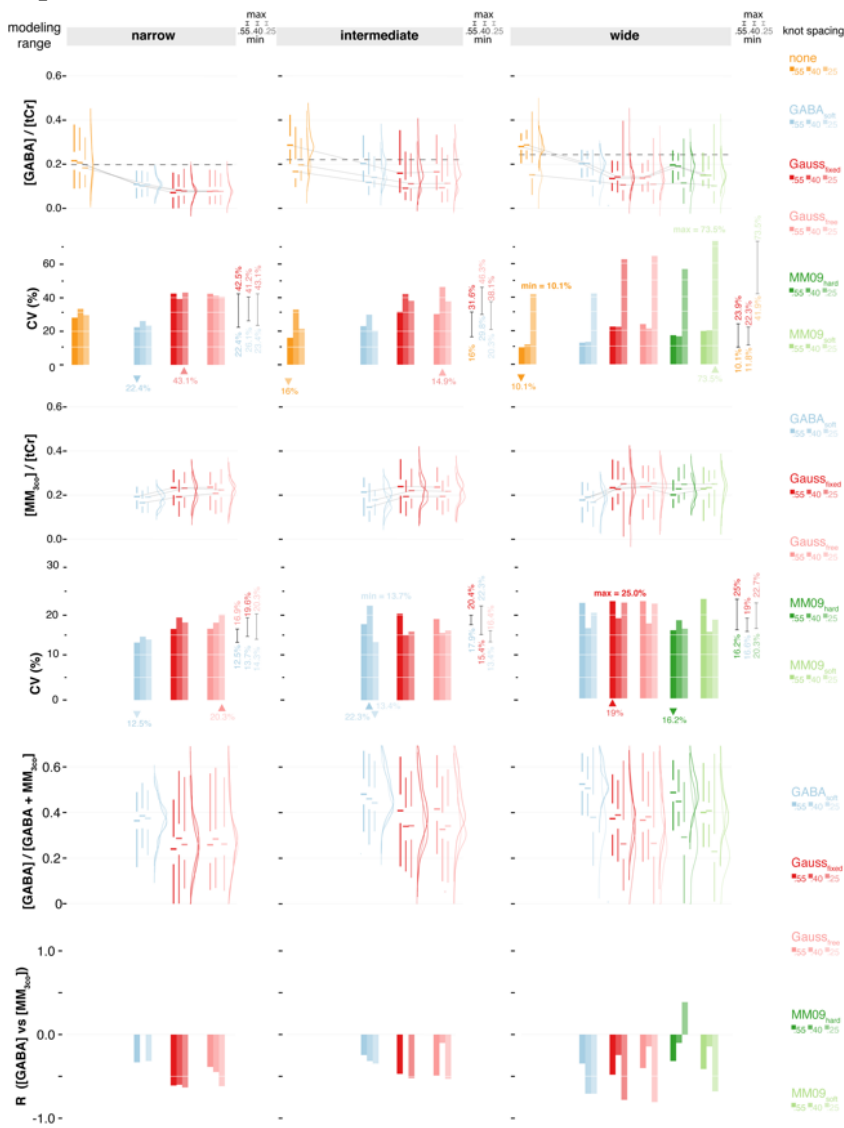

478

Figure 5 - Distribution of GABA and MM<sub>3co</sub> estimates, relative contribution of GABA to GABA+ and Pearson's R between GABA and MM<sub>3co</sub> for all modeling strategies. All three modeling ranges (column) and three spline knot spacings (within each column), and MM<sub>3co</sub> models (color-coded) are presented. Distributions are shown as half-violins (smoothed distribution), box plots with median, interquartile range, and 25<sup>th</sup>/75<sup>th</sup> quartile. The median lines of the box plots are connected to visualize trends within a specific baseline knot spacing. The mean estimates across the three spline knot spacings of the 'none' approach are indicated as a dashed line for each modeling range. Across subject CVs are summarized as bar plots. Minimum/maximum CVs for each modeling range are indicated as downwards/upwards triangle in the color corresponding to the MM<sub>3co</sub> model. Minimum/maximum CVs for each baseline knot spacing within a specific modeling range are reported on the right side of each column. Global minimum and maximum CVs across all models are added as text.

**Figure 5** shows the distributions and CVs of the separate GABA and MM<sub>3co</sub> estimates of all modeling strategies. Including a separate MM<sub>3co</sub> basis function significantly decreases GABA estimates, suggesting that not doing so may lead to GABA overestimation, as MM signal is mistakenly modeled as GABA. As was seen for the composite GABA+ estimates in **Figure 3**, sparser knot spacing appears to stabilize modeling, leading to lower CVs of GABA. This becomes especially obvious for the wide modeling range, where GABA CVs exceed 50% for dense knot spacing.

MM<sub>3co</sub> estimates are stable across the different knot spacings, suggesting that the different parametrizations accurately account for most of the co-edited MM signal at 3 ppm.

479 The GABA model, in combination with a wide modeling range and 0.55 ppm knot spacing, ex-  
480 hibits the lowest CV for GABA (10.4%). However, the MM09<sub>hard</sub> model in combination with the  
481 same knot spacing and modeling range has only slightly higher GABA CVs (17.3%) with the  
482 corresponding MM<sub>3co</sub> CVs being 16.2% (MM09<sub>hard</sub>). Again, despite slightly higher CV values it  
483 is beneficial to use a modeling strategy with a constraint to an ‘external’ reference peak  
484 (MM09<sub>hard</sub>) instead of the highly overlapped MM<sub>3co</sub> peak of GABA<sub>soft</sub> (CV = 12.8%), or entirely  
485 omitting MM<sub>3co</sub>. Additionally, the correlation between the GABA and the MM<sub>3co</sub> estimates is  
486 lower for the MM09<sub>hard</sub> model, potentially implying a better separation of GABA and MM<sub>3co</sub>.  
487 However, a separation of GABA and co-edited macromolecules remains difficult with a low-to-  
488 moderate correlation between GABA and MM<sub>3co</sub> estimates for all but one modeling strategy  
489 (MM09<sub>hard</sub> for the wide fit range and 0.4 ppm baseline knot spacing). Supplementary Material 5  
490 reports the mean and SDs of the GABA and MM<sub>3co</sub> estimates as well as the statistics. Significant  
491 differences between the mean or the SD compared to the corresponding model omitting co-ed-  
492 ited MMs are indicated as shaded box.  
493

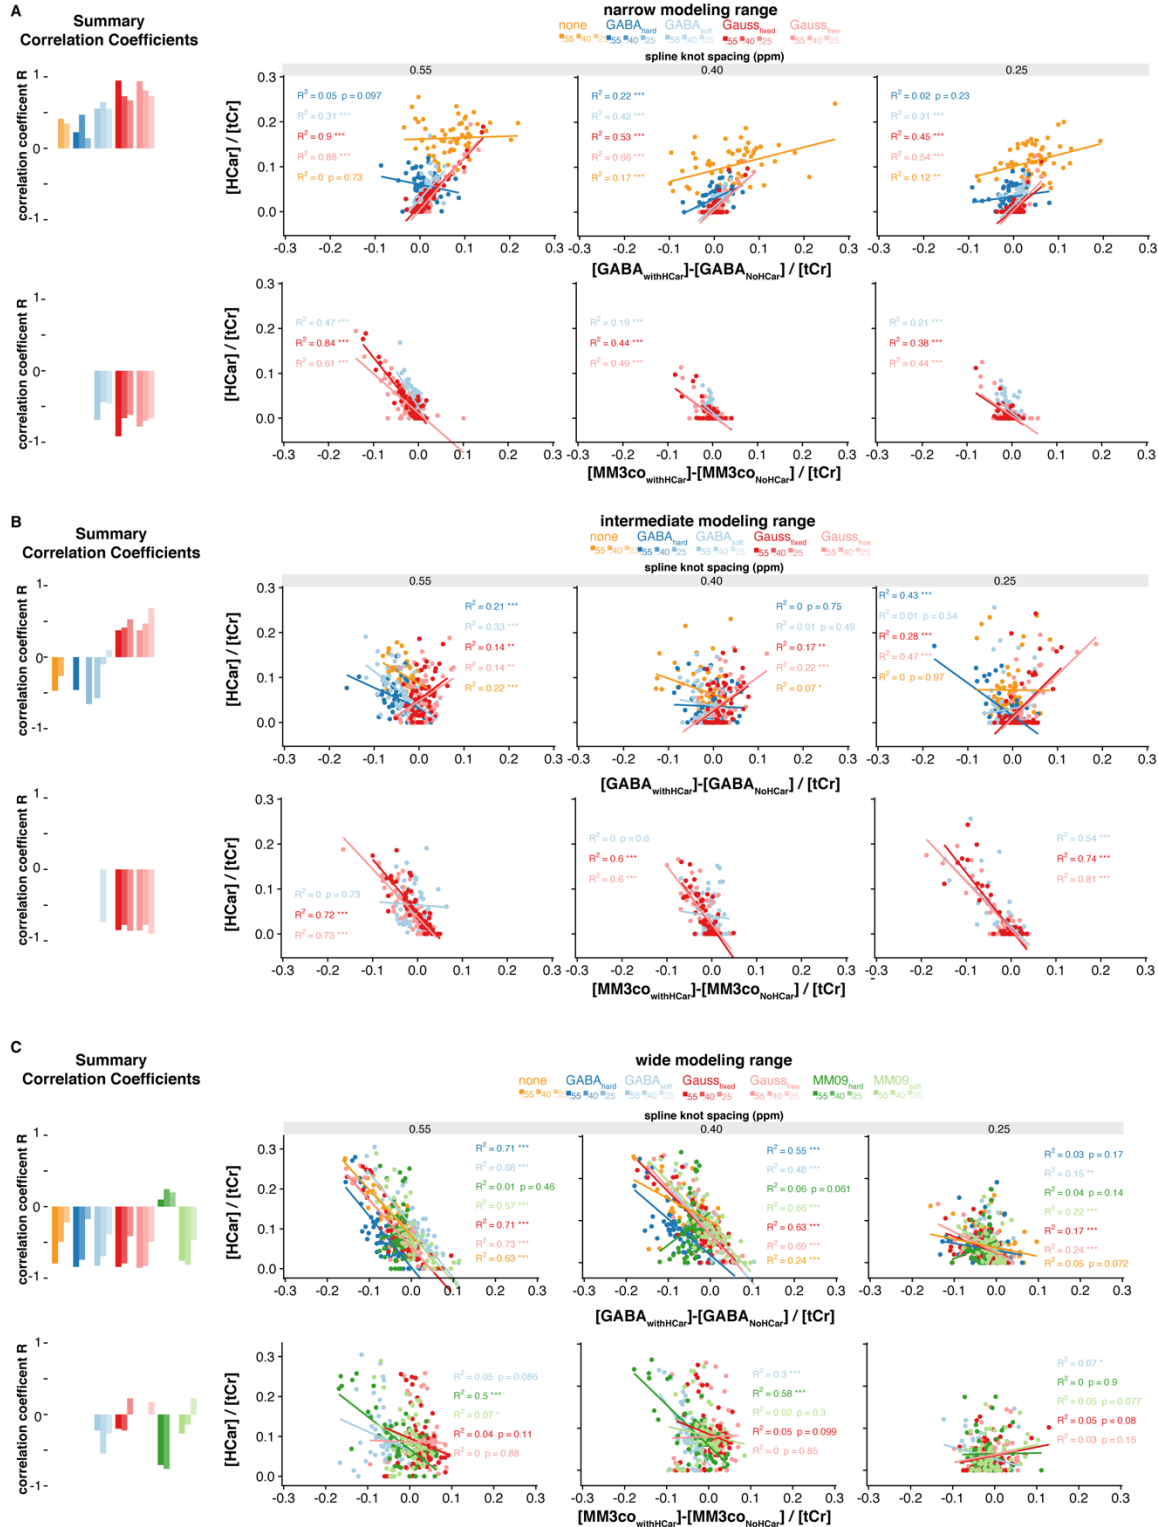

494

*Figure 6 – Impact of including homocarnosine in the basis set. The directionality of the correlation indicates that HCar absorbs GABA signal specifically for the intermediate and wide modeling range and absorbs MM<sub>3co</sub> signal for all modeling ranges. Correlation analysis between the differences between GABA/ MM<sub>3co</sub> estimates with and without HCar in the basis set and the*

*HCar estimates. All three modeling ranges (A-C) and three spline knot spacings (within each subplot) were investigated. A summary bar plot with the correlation coefficient  $R$  is shown in the beginning of each row. Pearson's correlation was calculated for each  $MM_{3co}$  model (color-coded). Asterisks indicate significant correlations with  $p < 0.05 = *$ ,  $p < 0.01 = **$ , and  $p < 0.001 = ***$ .*

495 Finally, **Figure 6** shows the impact of including HCar into the basis set with the difference in  
496 GABA and  $MM_{3co}$  estimates between the modeling strategies with and without HCar ( $\Delta GABA$   
497 and  $\Delta MM_{3co}$ , respectively). Interestingly, clear differences in the systematic effects of HCar are  
498 evident between the modeling ranges:  
499 For the narrow modeling range (**Figure 6 A**), HCar estimates correlate positively with  $\Delta GABA$ ,  
500 but the correlation is *only* substantial ( $R > 0.25$ ) for strategies with a *separate* MM basis  
501 function. For precisely these strategies, HCar estimates correlate negatively with  $\Delta MM_{3co}$ . These  
502 observations suggest that HCar is likely to account for  $MM_{3co}$  in the narrow modeling range. In  
503 contrast, HCar and  $\Delta GABA$  correlate negatively for most strategies in the intermediate and wide  
504 modeling ranges (**Figure 6 B and C**). The negative correlations between HCar and  $\Delta MM_{3co}$  are  
505 notably weaker for these modeling ranges, indicating that HCar is more likely to substitute for  
506 GABA signal instead of MM.  
507 This behavior can possibly be explained by the HCar signal shape for each modeling range  
508 (**Supplementary Material 6**). For the narrow modeling range, the HCar basis function offers the  
509 model an additional degree of freedom to account for deviations of the actual edited 3-ppm  
510 signal from pure GABA and the symmetric Gaussian  $MM_{3co}$  component, as no resonances  
511 below 2.78 ppm are considered. As a result, HCar shows a high correlation with the difference in  
512  $MM_{3co}$ . For the intermediate and wide range, the HCar difference spectrum basis function more  
513 nearly resembles its GABA counterpart since other resonances are included, thereby more  
514 effectively coupling GABA and HCar estimates to each other. Perhaps unsurprisingly, HCar  
515 estimates are significantly higher for 'none' modeling strategy, and are substantially lower for  
516 more flexible baselines, supporting the notion that HCar rather serves as a substitute for an  
517 explicit MM signal, in particular if the baseline cannot absorb the latter (**Supplementary**  
518 **Material 6**). Within a given knot spacing and modeling range, HCar estimates are comparable  
519 between different  $MM_{3co}$  models, a behavior observed for GABA estimates as well.  
520 The GABA+ plus homocarnosine estimates show a slight increase compared to the GABA+  
521 estimates without HCar (**Supplementary Material 7**). For the 'none' model, stronger changes

522 occur as HCar accounts for MM signal (see also Figure 6). There was no improvement in the  
523 CVs observed when including HCar in the model. The relative contribution of HCar to GABA+  
524 ranged between 2.2% and 19.1% for modeling strategies with an MM<sub>3co</sub> basis function and  
525 between 18% and 36% for the ‘none’ model.  
526

## 527 **Discussion**

528 The application of linear combination modeling to edited difference spectra is neither straightfor-  
529 ward nor intuitive. The conceptual advantage of spectral editing arises from isolating a resolved  
530 target resonance, i.e. reducing the overlap of the target metabolite with other signals, as well as  
531 the number of signals in the spectrum in general<sup>1</sup>. LCM, on the other hand, benefits from maxim-  
532 izing the use of prior knowledge to solve the spectral modeling problem, i.e. using all available  
533 information for meaningful constraint, including from overlapping signals. The specific case of  
534 GABA-edited MRS at 3T poses unique and unresolved challenges. Firstly, a compromise must  
535 be drawn between maximizing the prior knowledge by increasing the modeling range and reduc-  
536 ing the impact of co-edited and unwanted signals. Secondly, an appropriate parametrization of  
537 poorly characterized co-edited signals must be found, and possible interactions with the target  
538 metabolite GABA must be evaluated. Thirdly, effects of baseline modeling must be studied,  
539 again a consequence of the macromolecular background signal in the GABA-edited difference  
540 spectrum not being determined to this date. In this study, a total of 102 linear combination mod-  
541 eling strategies were compared for GABA-edited difference spectra, each with different model-  
542 ing ranges, parametrizations of co-edited signals, and baseline model flexibility. The key find-  
543 ings are:

- 544 • Including a dedicated basis function for co-edited MM improves fit residuals,  
545 reduces CVs of GABA and GABA<sup>+</sup> estimates, and avoids overestimation of  
546 GABA.
- 547 • Reducing the modeling range does not substantially stabilize or destabilize  
548 modeling, while removing potentially valuable information (MM<sub>0.93</sub> and 2-ppm  
549 NAA peak) from the optimization.
- 550 • Sparser baseline spline knot spacing leads, on average, to the lowest CV across all  
551 modeling ranges.

552 There is surprisingly little systematic investigation into linear combination modeling of GABA-  
553 edited difference spectra. To the best of our knowledge, there is only one conference abstract  
554 studying MM parametrization in GABA-edited MRS with the LCMModel software<sup>27</sup>. The results  
555 from this preliminary investigation indicate that including a specific MM basis function

556 significantly reduces GABA estimates and were confirmed in the subsequent study <sup>28</sup>, which is  
557 substantiated by our findings.

558  
559 Although the substantial contribution of broad MM signals to the 3-ppm peak in the GABA-ed-  
560 ited spectrum is widely known<sup>1,35</sup>, it is rarely explicitly addressed in linear combination model-  
561 ing. Instead, it is assumed that either an incomplete model (without explicit MM term) will still  
562 provide an accurate GABA estimate, or that baseline modeling will account for the MM signal.  
563 The current results provide evidence that including an appropriately parametrized MM model is  
564 a preferable and easily implemented strategy, reducing the residual over the 3-ppm signal range  
565 by up to 30%, with similar or lower CVs for GABA+. In contrast, not including an MM model  
566 likely causes systematic overestimation of GABA, as the least-squares optimization attempts to  
567 minimize the model-data difference with an inadequate set of basis functions (only GABA), par-  
568 ticularly when a rigid baseline is chosen. Including MM<sub>3co</sub> is a justified and reasonable measure  
569 without overfitting (reflected by AIC), and stable mean estimates and CVs of MM<sub>3co</sub> suggest an  
570 adequately parametrized model.

571  
572 The different MM models in this study were based on certain assumptions, including the relative  
573 contribution of MM<sub>3co</sub> to the 3-ppm GABA peak to be around 50%<sup>1,6,8,19</sup>. Levels of MM<sub>0,93</sub> have  
574 been found to be stable across the whole brain<sup>36</sup> and are thought to be stable across healthy sub-  
575 jects. Under these assumptions, the MM09<sub>hard</sub> model with a rigid amplitude coupling between  
576 MM<sub>3co</sub> and the non-overlapped MM<sub>0,93</sub> peak is a suitable strategy, supported by favorable CVs  
577 and  $\Delta$ AIC. Further studies need to be performed to investigate the distribution and correlation  
578 between MM<sub>0,93</sub> and MM<sub>3co</sub> in the brain.

579  
580 Unedited MRSI data measured at 7T indicates significant differences between white and gray  
581 matter for several macromolecules in the healthy brain<sup>36</sup>. Changes in the MM concentrations dur-  
582 ing disease may also affect the relative contribution to the 3-ppm peak, and therefore render  
583 models with prior amplitude assumptions inaccurate. If there is reason to expect strong fluctua-  
584 tions of MM<sub>3co</sub>, a modeling strategy with fewer assumptions about amplitude ratios between the  
585 metabolite of interest GABA or the MM<sub>0,93</sub> signal and the MM<sub>3co</sub> signal is preferable to the  
586 MM09<sub>hard</sub> strategy. Here, the Gauss<sub>free</sub> and Gauss<sub>fixed</sub> strategies could be used to account for



587 changes in the MM<sub>3co</sub> contribution more freely, as their mean estimates of GABA and GABA+  
588 were in good agreement with the more constrained approaches, although they led to increased  
589 CVs and  $\Delta$ AICs. In addition, the less-constrained models might be more appropriate for investi-  
590 gating changes in MM<sub>3co</sub> due to age<sup>37</sup> or disease, or for exploring frequency-drift-related effects  
591 on the co-edited MM signal<sup>1,8,38</sup>. Another potential way to model the co-edited MM signal is to  
592 include lysine in the simulated basis set, as it has been identified as the potential source of the  
593 signal<sup>6</sup>, although this approach would require appropriate broadening and incorporation of chem-  
594 ical shift and coupling values from protein databases<sup>39</sup>.

595  
596 Overall, results did not differ drastically between modeling ranges, although it is noteworthy that  
597 the effects of baseline flexibility were less pronounced for the narrow modeling range, likely be-  
598 cause the complex interaction of the overlapping 2.25 ppm GABA and Glx signals with the un-  
599 derlying baselines is omitted. Furthermore, there was no evidence that the intermediate modeling  
600 range, which is proposed in the LCMModel manual<sup>18</sup> to avoid frequently occurring co-edited lipid  
601 signals, improved quantification substantially compared to both other modeling ranges, although  
602 it should be mentioned that this particular dataset did not suffer from severe lipid contamination.  
603 Taken together, the choice of modeling range does not impact quantitative results as substantially  
604 as the inclusion of an MM model.

605  
606 Baseline models are included in most LCM algorithms to account for signals not otherwise mod-  
607 eled, e.g. residual water tails or unparametrized macromolecules and lipids. Compared to con-  
608 ventional short-TE spectra, water and non-co-edited MMs are removed upon subtraction in the  
609 GABA-edited spectrum, which is therefore frequently modeled with a stiffer baseline<sup>4,18</sup>. Our re-  
610 sults show that sparser knot spacing (0.55 ppm) leads to lower CVs in metabolite estimates. A  
611 more flexible baseline (0.25 ppm) improves local and global residuals, but not enough to justify  
612 the additional model parameters (as per the AICs). More importantly, an overly flexible baseline  
613 may absorb edited signal, although it appeared that it did not do so excessively even for the 0.25-  
614 ppm strategies. The exception was the ‘none’ model, where the baseline was the only available  
615 part of the model to take up signal, underlining the inadequacy of the default LCMModel approach.  
616 Taken together, a relatively rigid baseline with a parametrized MM basis function is preferable  
617 for LCM of GABA-edited spectra. A caveat to this recommendation is the observation of

618 structural baseline fluctuations underneath the 2.25 ppm signals from GABA, Glx, GSH, NAA  
619 and NAAG, particularly for the 0.25 ppm knot spacing and a relatively broad increase in the  
620 baseline between 2.7 and 3 ppm. These were observed previously<sup>27</sup>, and are likely signals from  
621 un-parametrized MMs directly and indirectly affected by the editing pulse. Rigid baselines may  
622 force a wrong metabolite model in that region and interfere with accurate estimation of GABA  
623 and Glx. In fact, the structural Glx residual at 3.75 ppm suggests a systematic misestimation of  
624 the Glx phase, likely driven by the 2.25 ppm signals. While beyond the scope of this investiga-  
625 tion, it is conceivable that more informed parametrization (or, ideally, direct measurement) of  
626 this unexplored MM background may benefit the modeling of the entire difference spectrum. Al-  
627 ternatively, hitherto unexplored approaches with variable baseline knot spacing may be worth  
628 investigating.

629  
630 The HCar molecule has a GABA moiety with similar chemical shifts and is therefore co-edited.  
631 Evidence regarding in-vivo HCar levels in the human brain is inconclusive – early work deter-  
632 mined HCar levels to be 0.5 mM<sup>5</sup> (compared to ~1 mM for GABA), while a recent hybrid up-  
633 field/downfield inversion-recovery method determined the HCar/GABA ratio as 17%<sup>40</sup>. There-  
634 fore, we tested the impact of adding HCar to the basis set without additional constraints. Includ-  
635 ing HCar systematically affected GABA and MM<sub>3co</sub> estimates, in a way that strongly depended  
636 on the choice of modeling range. HCar estimates themselves ranged from 2.2% to 19.1% of the  
637 GABA+ signal, depending strongly on the degree of baseline flexibility. The results suggest that  
638 the overlap between the three model terms (HCar, GABA, MM<sub>3co</sub>) is too substantial for reliable  
639 three-way separation, particularly in the presence of a highly flexible baseline. A minor increase  
640 in “GABA+ plus HCar” estimates compared to GABA+ estimates was observed and the inclu-  
641 sion of HCar did not substantially improve the CVs. Additionally, the disagreement between the  
642 model and the data at 2.9 ppm indicates that a simple unconstrained addition of HCar to the mod-  
643 eling is not justified.

644  
645 Symmetric GABA-editing (edit-ON frequency at 1.9 ppm and edit-OFF frequency at 1.7 ppm) is  
646 commonly used to eliminate the MM<sub>3co</sub> contamination of the 3-ppm GABA+ signal. In practice, B<sub>0</sub>  
647 instabilities lead to residual MM<sub>3co</sub> components with variable polarity<sup>11</sup>. The Gauss<sub>free</sub> and  
648 Gauss<sub>fixed</sub> MM<sub>3co</sub> models could potentially be used to account for those variable MM<sub>3co</sub>

649 contributions in those spectra. Modeling of those spectra with the current strategies that do have  
650 a non-negative model component as constraint would be challenging. Those modeling strategies  
651 could potentially be adapted by using the  $B_0$  history during the experiment<sup>38</sup> to predict the polar-  
652 ity and relative amplitude of the  $MM_{3co}$  signal, and include those as a soft constraint relative to  
653 the  $MM_{09}$  signal ( $MM_{09_{hard}}$  or  $MM_{09_{soft}}$ ) or the GABA signal ( $GABA_{hard}$  or  $GABA_{soft}$ ).

#### 654 Limitations

655 A limitation of this study is the high spectral quality (SNR, linewidth, no apparent subtraction  
656 artefacts, or lipid contaminations) of the dataset analyzed. We did not investigate model para-  
657 metrizations of movement or drift, which may introduce systematic changes to the co-edited MM  
658 signal. While our results suggest that using the wide modeling range with a rigid baseline is ben-  
659 efiticial, strong co-edited lipid signals are likely to not be modeled appropriately, and the interme-  
660 diate modeling range may be more suitable. Further studies of the possible impact of changes in  
661 spectral quality need to be performed to validate the modeling strategies under suboptimal condi-  
662 tions.

663  
664 Another limitation is that there is no ‘gold standard’ of metabolite level estimation in GABA-ed-  
665 ited MRS to validate the results against. The performance of different algorithms or in this study  
666 modeling strategy is often judged by the level of variance<sup>26</sup>. A lower variance does, of course,  
667 not necessarily reflect greater modeling accuracy, but under the assumption that the homogene-  
668 ous study population and data acquisition contribute comparably little biological and instrumen-  
669 tal variance, CVs will predominantly reflect variance introduced by the modeling approach. Re-  
670 cently, the field is witnessing increasing efforts to generate simulated spectra with known ground  
671 truth as a gold standard, although these approaches can only be successful to the extent that those  
672 spectra are truly representative of in-vivo data. Further, such gold standard studies with a known  
673 ground truth could be used to validate whether a correct separation of GABA and  $MM_{3co}$  is  
674 achievable by advanced LCM. This study indicates a low-to-moderate correlation between the  
675 GABA and  $MM_{3co}$  estimates, suggesting that the two components are not reliably separated.  
676 However, some of the modeling strategies appeared to have a lower association between both es-  
677 timates and could possibly be validated further on a synthetic dataset with known GABA and  
678  $MM_{3co}$  concentrations.

679

680 AIC as a measure of the goodness of fit can be used for linear and non-linear approaches if the  
681 log-likelihood is obtained similarly. However, there are two potential limitations for the for the  
682 application of AIC in this study. First, for linear-combination modeling of MRS data, as imple-  
683 mented in Osprey, a non-linear optimization is followed by a linear optimization during each it-  
684 eration. Parameters are treated equally in the calculation of the AIC regardless of whether they  
685 are non-linear (e.g., a phase parameter) or linear (an amplitude parameter). Second, the AIC pe-  
686 nalizes complex models, but does not measure effects of soft constraints and is likely to prefer  
687 models without a soft constraint as those should have a reduced likelihood<sup>41</sup>. Here, we intro-  
688 duced a rather arbitrary correction term of 0.5 per soft constraint for those models to reduce this  
689 effect. Therefore, the resulting  $\Delta$ AIC values in this study should be interpreted with care and  
690 considered as only one among several metrics to evaluate model performance.

## 691 **Conclusion**

692 This study proposed and compared different modeling strategies for LCM of GABA+-edited dif-  
693 ference spectra from a multi-site MEGA-PRESS dataset. Introducing a parametrized model for  
694 co-edited macromolecules reduces fit residuals, while maintaining low coefficients of variation  
695 of GABA+ estimates. A rigid baseline was found to be beneficial, while using a narrower model-  
696 ing range did not significantly improve the modeling. The overall modeling results suggest that  
697 GABA-edited data are reliably modeled with an adequately parametrized MM<sub>3co</sub> model, con-  
698 strained by the non-overlapped 0.93-ppm MM resonance, in combination with a full modeling  
699 range and sparse knot spacing. Incorporating homocarnosine into the modeling did not signifi-  
700 cantly improve the GABA+ estimates and did not allow for a stable separation of GABA and  
701 HCar.

## 702 **References**

- 703 1. Choi I-Y, Andronesi OC, Barker P, et al. Spectral editing in <sup>1</sup>H magnetic resonance spectroscopy: Experts' consensus recommendations. *NMR Biomed.* 2021;n/a(n/a):e4411.  
704 doi:<https://doi.org/10.1002/nbm.4411>  
705
- 706 2. Edden RAE, Puts NAJ, Harris AD, Barker PB, Evans CJ. Gannet: A batch-processing tool  
707 for the quantitative analysis of gamma-aminobutyric acid-edited MR spectroscopy spectra.  
708 *J Magn Reson Imaging.* 2014;40(6):1445-1452. doi:10.1002/jmri.24478
- 709 3. Wilson M, Reynolds G, Kauppinen RA, Arvanitis TN, Peet AC. A constrained least-  
710 squares approach to the automated quantitation of in vivo <sup>1</sup>H magnetic resonance spectroscopy  
711 data. *Magn Reson Med.* 2011;65(1):1-12.
- 712 4. Provencher SW. Automatic quantitation of localized in vivo <sup>1</sup>H spectra with LCModel.  
713 *NMR Biomed.* 2001;14(4):260-264. doi:10.1002/nbm.698
- 714 5. Petroff OAC, Hyder F, Rothman DL, Mattson RH. Topiramate Rapidly Raises Brain  
715 GABA in Epilepsy Patients. *Epilepsia.* 2001;42(4):543-548.  
716 doi:<https://doi.org/10.1046/j.1528-1157.2001.18800.x>
- 717 6. Deelchand DK, Marjańska M, Henry P-G, Terpstra M. MEGA-PRESS of GABA+: Influ-  
718 ences of acquisition parameters. *NMR Biomed.* 2019;n/a(n/a):e4199.  
719 doi:<https://doi.org/10.1002/nbm.4199>
- 720 7. Marjańska M, Terpstra M. Influence of fitting approaches in LCModel on MRS quantifica-  
721 tion focusing on age-specific macromolecules and the spline baseline. *NMR Biomed.* No-  
722 vember 2019. doi:10.1002/nbm.4197
- 723 8. Shungu DC, Mao X, Gonzales R, et al. Brain  $\gamma$ -aminobutyric acid (GABA) detection in  
724 vivo with the J-editing (<sup>1</sup>H) MRS technique: a comprehensive methodological evaluation  
725 of sensitivity enhancement, macromolecule contamination and test-retest reliability. *NMR*  
726 *Biomed.* 2016;29(7):932-942. doi:10.1002/nbm.3539
- 727 9. Bhagwagar Z, Wylezinska M, Jezzard P, et al. Reduction in Occipital Cortex  $\gamma$ -Aminobu-  
728 tyric Acid Concentrations in Medication-Free Recovered Unipolar Depressed and Bipolar  
729 Subjects. *Biol Psychiatry.* 2007;61(6):806-812. doi:10.1016/j.biopsych.2006.08.048
- 730 10. Mikkelsen M, Barker PB, Bhattacharyya PK, et al. Big GABA: Edited MR spectroscopy at  
731 24 research sites. *NeuroImage.* 2017;159:32-45. doi:10.1016/j.neuroimage.2017.07.021
- 732 11. Edden RAE, Oeltzschner G, Harris AD, et al. Prospective frequency correction for macro-  
733 molecule-suppressed GABA editing at 3T. *J Magn Reson Imaging JMRI.* 2016;44(6):1474-  
734 1482. doi:10.1002/jmri.25304
- 735 12. Oeltzschner G, Zöllner HJ, Hui SCN, et al. Osprey: Open-source processing, reconstruction  
736 & estimation of magnetic resonance spectroscopy data. *J Neurosci Methods.*  
737 2020;343:108827. doi:10.1016/j.jneumeth.2020.108827

- 738 13. Osprey GitHub repository. Osprey GitHub repository. <https://github.com/schorschinho/osprey>. Published 2020. Accessed May 27, 2020.  
739
- 740 14. Klose U. In vivo proton spectroscopy in presence of eddy currents. *Magn Reson Med*.  
741 1990;14(1):26-30. doi:10.1002/mrm.1910140104
- 742 15. Mikkelsen M, Tapper S, Near J, Mostofsky SH, Puts NAJ, Edden RAE. Correcting fre-  
743 quency and phase offsets in MRS data using robust spectral registration. *NMR Biomed*. July  
744 2020:e4368. doi:10.1002/nbm.4368
- 745 16. Barkhuijsen H, de Beer R, van Ormondt D. Improved algorithm for noniterative time-do-  
746 main model fitting to exponentially damped magnetic resonance signals. *J Magn Reson*  
747 1969. 1987;73(3):553-557. doi:10.1016/0022-2364(87)90023-0
- 748 17. Simpson R, Devenyi GA, Jezzard P, Hennessy TJ, Near J. Advanced processing and simu-  
749 lation of MRS data using the FID appliance (FID-A)—An open source, MATLAB-based  
750 toolkit. *Magn Reson Med*. 2017;77(1):23-33. doi:10.1002/mrm.26091
- 751 18. Provencher S. LCMModel & LCMgui User's Manual. LCMModel & LCMgui User's Manual.  
752 <http://s-provencher.com/pub/LCMModel/manual/manual.pdf>. Published 2020. Accessed April  
753 28, 2020.
- 754 19. Henry PG, Dautry C, Hantraye P, Bloch G. Brain gaba editing without macromolecule con-  
755 tamination. *Magn Reson Med*. 2001;45(3):517-520. doi:10.1002/1522-  
756 2594(200103)45:3<517::AID-MRM1068>3.0.CO;2-6
- 757 20. Levenberg K. A method for the solution of certain non-linear problems in least squares. *Q*  
758 *Appl Math*. 1944;2(2):164-168. doi:10.1090/qam/10666
- 759 21. Marquardt DW. An Algorithm for Least-Squares Estimation of Nonlinear Parameters. *J Soc*  
760 *Ind Appl Math*. 1963;11(2):431-441. doi:10.1137/0111030
- 761 22. Becker S. LBFGB (L-BFGS-B) mex wrapper - File Exchange - MATLAB Central.  
762 LBFGB (L-BFGS-B) mex wrapper - File Exchange - MATLAB Central.  
763 [https://www.mathworks.com/matlabcentral/fileexchange/35104-lbfgsb-l-bfgs-b-mex-wrap-](https://www.mathworks.com/matlabcentral/fileexchange/35104-lbfgsb-l-bfgs-b-mex-wrapper)  
764 [per](https://www.mathworks.com/matlabcentral/fileexchange/35104-lbfgsb-l-bfgs-b-mex-wrapper). Published February 23, 2015. Accessed March 3, 2021.
- 765 23. Byrd RH, Lu P, Nocedal J, Zhu C. A Limited Memory Algorithm for Bound Constrained  
766 Optimization. *SIAM J Sci Comput*. 1995;16(5):1190-1208. doi:10.1137/0916069
- 767 24. Zhu C, Byrd RH, Lu P, Nocedal J. Algorithm 778: L-BFGS-B: Fortran subroutines for  
768 large-scale bound-constrained optimization. *ACM Trans Math Softw*. 1997;23(4):550-560.  
769 doi:10.1145/279232.279236
- 770 25. Wilson M, Andronesi O, Barker PB, et al. *Methodological Consensus on Clinical Proton*  
771 *MRS of the Brain: Review and Recommendations*. Vol 82. John Wiley and Sons Inc.; 2019.  
772 doi:10.1002/mrm.27742

- 773 26. Zöllner HJ, Považan M, Hui SCN, Tapper S, Edden RAE, Oeltzschner G. Comparison of  
774 different linear-combination modeling algorithms for short-TE proton spectra. *NMR Bio-*  
775 *med*. 2021;n/a(n/a):e4482. doi:<https://doi.org/10.1002/nbm.4482>
- 776 27. Murdoch JB, Dydak U. Modeling MEGA-PRESS macromolecules for a better grasp of  
777 GABA. In: *19th Annual Meeting of the International Society for Magnetic Resonance in*  
778 *Medicine (ISMRM)*. ; 2011. [https://scholar.google.com/scholar\\_lookup?title=Model-](https://scholar.google.com/scholar_lookup?title=Modeling%20MEGA-PRESS%20macromolecules%20for%20a%20better%20grasp%20of%20GABA&publication_year=2011&author=J.B.%20Murdoch&author=U.%20Dydak)  
779 [ing%20MEGA-PRESS%20macromolecules%20for%20a%20bet-](https://scholar.google.com/scholar_lookup?title=Modeling%20MEGA-PRESS%20macromolecules%20for%20a%20better%20grasp%20of%20GABA&publication_year=2011&author=J.B.%20Murdoch&author=U.%20Dydak)  
780 [ter%20grasp%20of%20GABA&publication\\_year=2011&author=J.B.%20Murdoch&au-](https://scholar.google.com/scholar_lookup?title=Modeling%20MEGA-PRESS%20macromolecules%20for%20a%20better%20grasp%20of%20GABA&publication_year=2011&author=J.B.%20Murdoch&author=U.%20Dydak)  
781 [thor=U.%20Dydak](https://scholar.google.com/scholar_lookup?title=Modeling%20MEGA-PRESS%20macromolecules%20for%20a%20better%20grasp%20of%20GABA&publication_year=2011&author=J.B.%20Murdoch&author=U.%20Dydak). Accessed July 1, 2020.
- 782 28. Dydak U, Jiang YM, Long LL, et al. In vivo measurement of brain GABA concentrations  
783 by magnetic resonance spectroscopy in smelters occupationally exposed to manganese. *En-*  
784 *viron Health Perspect*. 2011;119(2):219-224. doi:10.1289/ehp.1002192
- 785 29. R Core Team. *R: A Language and Environment for Statistical Computing*. Vienna, Austria:  
786 R Foundation for Statistical Computing; 2017. <https://www.R-project.org/>.
- 787 30. SpecVis GitHub repository. SpecVis GitHub repository.  
788 <https://github.com/hezoe100/SpecVis>. Published 2020. Accessed May 27, 2020.
- 789 31. Wickham H. *Ggplot2: Elegant Graphics for Data Analysis*. Springer-Verlag New York;  
790 2009. <http://ggplot2.org>.
- 791 32. Zöllner HJ. Comparison of linear-combination modeling strategies for GABA-edited MRS  
792 at 3T. <https://osf.io/aqm8f/>. Published April 30, 2021. Accessed April 30, 2021.
- 793 33. Akaike H. A new look at the statistical model identification. *IEEE Trans Autom Control*.  
794 1974;19(6):716-723. doi:10.1109/TAC.1974.1100705
- 795 34. Mikkelsen M, Rimbault DL, Barker PB, et al. Big GABA II: Water-referenced edited MR  
796 spectroscopy at 25 research sites. *NeuroImage*. 2019;191:537-548. doi:10.1016/J.NEU-  
797 ROIMAGE.2019.02.059
- 798 35. Cudalbu C, Behar KL, Bhattacharyya PK, et al. Contribution of macromolecules to brain  
799 <sup>1</sup>H MR spectra: Experts' consensus recommendations. *NMR Biomed Revis*. 2020.
- 800 36. Považan M, Strasser B, Hangel G, et al. Simultaneous mapping of metabolites and individ-  
801 ual macromolecular components via ultra-short acquisition delay <sup>1</sup>H MRSI in the brain at  
802 7T. *Magn Reson Med*. 2018;79(3):1231-1240. doi:10.1002/mrm.26778
- 803 37. Marjańska M, Deelchand DK, Hodges JS, et al. Altered macromolecular pattern and con-  
804 tent in the aging human brain. *NMR Biomed*. 2018;31(2):e3865. doi:10.1002/nbm.3865
- 805 38. Veen JW van der, Marengo S, Berman KF, Shen J. Retrospective correction of frequency  
806 drift in spectral editing: The GABA editing example. *NMR Biomed*. 2017;30(8):e3725.  
807 doi:<https://doi.org/10.1002/nbm.3725>



- 808 39. Borbath T, Manohar SM, Henning A. Towards a Fitting Model of Macromolecular Spectra:  
809 Amino Acids. In: *27th Annual Meeting of the International Society for Magnetic Resonance*  
810 *in Medicine (ISMRM)*. Montreal, Canada; 2019.
- 811 40. Landheer K, Prinsen H, Petroff OA, Rothman DL, Juchem C. Elevated homocarnosine and  
812 GABA in subject on isoniazid as assessed through 1H MRS at 7T. *Anal Biochem*.  
813 2020;599:113738. doi:10.1016/j.ab.2020.113738
- 814 41. Endres DM, Chiovetto E, Giese M. Model selection for the extraction of movement primi-  
815 tives. *Front Comput Neurosci*. 2013;7. doi:10.3389/fncom.2013.00185
- 816

## **Supplementary Material**

### **Table of Contents**

1. List of included subjects
2. Macro-molecule function definitions
3. Data overview
4. Statistics - GABA and MM<sub>3co</sub> estimates
5. Model overview basis set with homocarnosine
6. Distribution of GABA+ and homocarnosine

*Supplementary Material 1 – List of included subjects. All datasets are available at <https://www.ni-trc.org/projects/biggabe/>*

| <b>site</b>                    | <b>subjects</b>                                 | <b><math>\Sigma</math></b>      |
|--------------------------------|-------------------------------------------------|---------------------------------|
| P01                            | S01,S03,S04,S05,S08                             | 5                               |
| P03                            | S02,S03,S04,S07,S08,S09,S10,S11,S12             | 9                               |
| P05                            | S01,S02,S03,S05,S06,S07,S08                     | 7                               |
| P06                            | S01,S02,S03,S04,S05,S06,S07,S08,S09             | 9                               |
| P07                            | S02,S03,S04,S09,S10,S11,S12                     | 7                               |
| P08                            | S01,S02,S03,S04,S05,S06,S07,S08,S09,S10,S11,S12 | 12                              |
| P09                            | S01,S02,S03,S04,S05,S06,S07,S08,S09,S10,S11,S12 | 12                              |
| <b><math>\Sigma = 7</math></b> |                                                 | <b><math>\Sigma = 61</math></b> |

**Supplementary Material 2.** Properties of the Gaussian functions of the broad macromolecule and lipid resonances included in the basis sets, taken from section 11.7 of the LCMoDel manual. The amplitude values are scaled relative to the CH<sub>3</sub> singlet of creatine with amplitude 3.

| <i>Name</i>                          | <i>Frequencies [ppm]</i> | <i>FWHM [ppm]</i> | <i>Amplitude</i> |
|--------------------------------------|--------------------------|-------------------|------------------|
| <i>edit-OFF spectrum basis set</i>   |                          |                   |                  |
| MM <sub>0.94</sub>                   | 0.915                    | 0.14              | 3.00             |
| MM <sub>1.22</sub>                   | 1.22                     | 0.15              | 2.00             |
| MM <sub>1.43</sub>                   | 1.43                     | 0.17              | 2.00             |
| MM <sub>1.70</sub>                   | 1.67                     | 0.15              | 0.20             |
| MM <sub>2.05</sub>                   | 2.08                     | 0.15              | 1.33             |
|                                      | 2.25                     | 0.20              | 0.33             |
|                                      | 1.95                     | 0.15              | 0.33             |
|                                      | 3.00                     | 0.20              | 0.40             |
| Lip09                                | 0.89                     | 0.14              | 3.00             |
| Lip13                                | 1.28                     | 0.15              | 2.00             |
|                                      | 1.28                     | 0.089             | 2.00             |
| Lip20                                | 2.04                     | 0.15              | 1.33             |
|                                      | 2.25                     | 0.15              | 0.67             |
|                                      | 2.80                     | 0.20              | 0.87             |
| <i>Difference spectrum basis set</i> |                          |                   |                  |
| MM <sub>0.94</sub>                   | 0.915                    | 0.14              | 3                |
| MM <sub>3co</sub>                    | 3                        | <b>14 Hz</b>      | 2                |

## Data overview

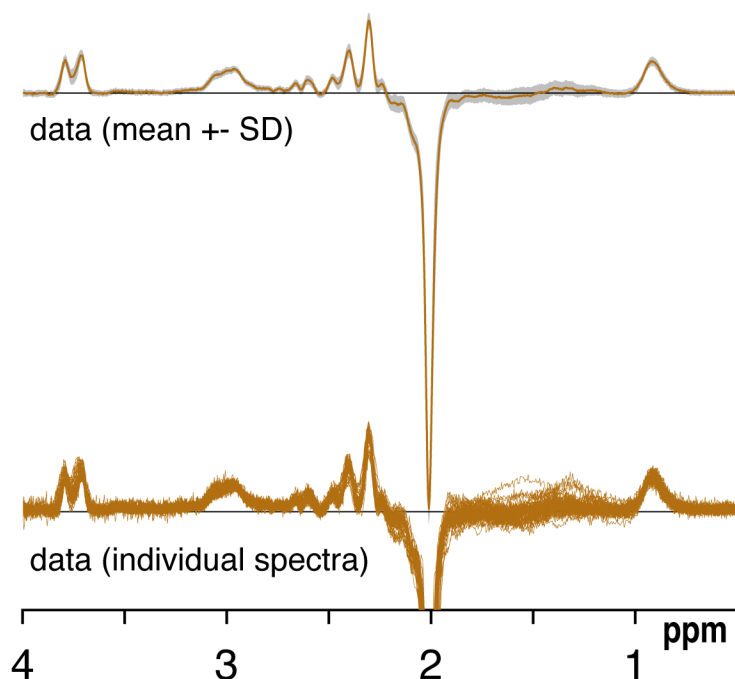

*Supplementary Material 4 – Overview of the processed data including the mean  $\pm$  SD and individual data.*

*Supplementary Material 5 – GABA and  $MM_{3co}$  mean and SDs for all modeling strategies (ratios to tCr). Significant differences ( $p < .05$ ) between the corresponding model and the 'none' are shaded in gray. Differences in  $MM_{3co}$  are compared between the corresponding model and the  $GABA_{soft}$  model and significant differences are also shaded in gray.*

| modeling range         |                      | narrow        | intermediate  | wide          |               |               |               |               |               |               |
|------------------------|----------------------|---------------|---------------|---------------|---------------|---------------|---------------|---------------|---------------|---------------|
| knot spacing (ppm)     |                      | 0.55          | 0.4           | 0.25          |               |               |               |               |               |               |
| none                   | [GABA]               | 0.22<br>.062  | 0.213<br>.071 | 0.193<br>.057 | 0.297<br>.048 | 0.186<br>.061 | 0.204<br>.044 | 0.284<br>.029 | 0.288<br>.034 | 0.158<br>.066 |
|                        | [MM <sub>3co</sub> ] | -             | -             | -             | -             | -             | -             | -             | -             | -             |
| GABA <sub>hard</sub>   | [GABA]               | 0.164<br>.021 | 0.146<br>.02  | 0.156<br>.023 | 0.207<br>.024 | 0.148<br>.031 | 0.165<br>.021 | 0.194<br>.021 | 0.207<br>.023 | 0.15<br>.034  |
|                        | [MM <sub>3co</sub> ] | -             | -             | -             | -             | -             | -             | -             | -             | -             |
| GABA <sub>soft</sub>   | [GABA]               | 0.108<br>.024 | 0.102<br>.027 | 0.108<br>.025 | 0.207<br>.048 | 0.13<br>.039  | 0.148<br>.03  | 0.203<br>.026 | 0.204<br>.027 | 0.115<br>.049 |
|                        | [MM <sub>3co</sub> ] | 0.19<br>.026  | 0.165<br>.025 | 0.186<br>.027 | 0.21<br>.038  | 0.148<br>.033 | 0.175<br>.024 | 0.172<br>.039 | 0.194<br>.032 | 0.156<br>.032 |
| Gauss <sub>fixed</sub> | [GABA]               | 0.074<br>.031 | 0.08<br>.031  | 0.081<br>.035 | 0.174<br>.055 | 0.106<br>.045 | 0.118<br>.045 | 0.136<br>.031 | 0.145<br>.032 | 0.108<br>.068 |
|                        | [MM <sub>3co</sub> ] | 0.233<br>.039 | 0.192<br>.038 | 0.223<br>.041 | 0.237<br>.048 | 0.192<br>.03  | 0.215<br>.035 | 0.233<br>.054 | 0.237<br>.045 | 0.235<br>.053 |
| Gauss <sub>free</sub>  | [GABA]               | 0.079<br>.034 | 0.078<br>.032 | 0.081<br>.033 | 0.18<br>.054  | 0.107<br>.05  | 0.119<br>.045 | 0.137<br>.033 | 0.145<br>.031 | 0.107<br>.069 |
|                        | [MM <sub>3co</sub> ] | 0.226<br>.038 | 0.198<br>.036 | 0.22<br>.045  | 0.229<br>.044 | 0.193<br>.031 | 0.213<br>.035 | 0.227<br>.057 | 0.237<br>.042 | 0.234<br>.053 |
| MM09 <sub>hard</sub>   | [GABA]               | -             | -             | -             | -             | -             | -             | 0.195<br>.034 | 0.189<br>.032 | 0.106<br>.06  |
|                        | [MM <sub>3co</sub> ] | -             | -             | -             | -             | -             | -             | 0.201<br>.032 | 0.232<br>.043 | 0.24<br>.04   |
| MM09 <sub>soft</sub>   | [GABA]               | -             | -             | -             | -             | -             | -             | 0.152<br>.03  | 0.154<br>.031 | 0.098<br>.072 |
|                        | [MM <sub>3co</sub> ] | -             | -             | -             | -             | -             | -             | 0.216<br>.051 | 0.232<br>.037 | 0.24<br>.045  |

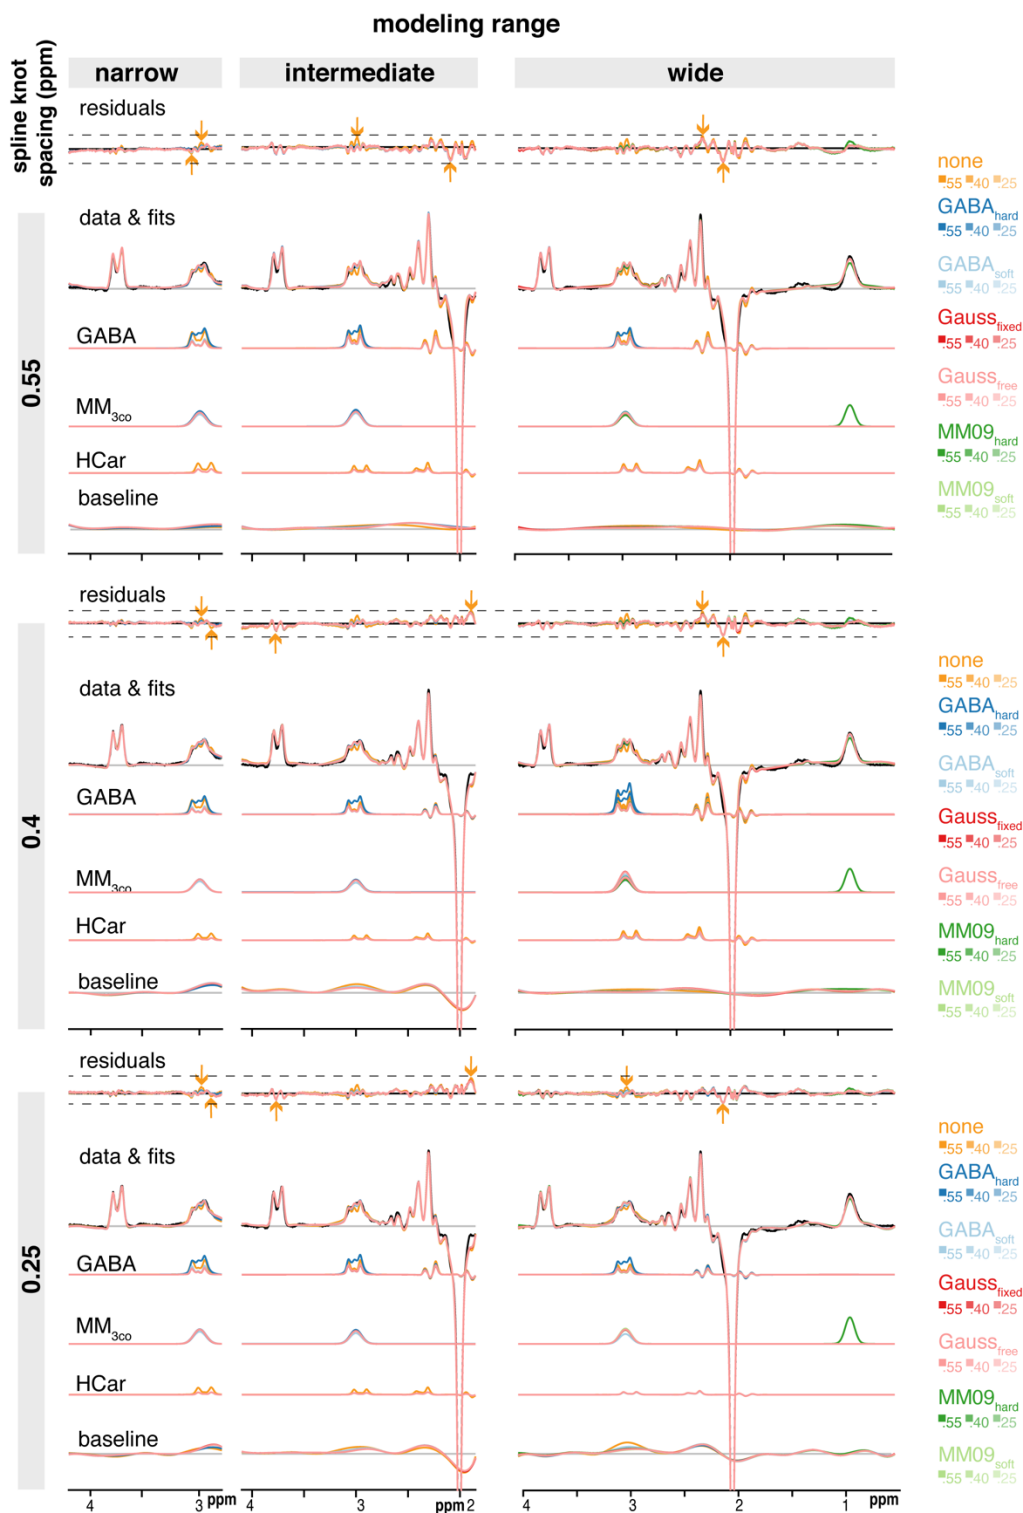

*Supplementary Material 6 – Mean modeling results and homocarnosine estimates for all modeling strategies with homocarnosine. A substantial structured residual is visible at 3 ppm if for all modeling strategies and for the narrow and intermediate modeling range the homocarnosine concentrations are significantly lower compared to omitting the co-edited MM, especially for knot spacings  $\leq 0.4$  ppm . All*

three modeling ranges (columns), three spline knot spacings (rows), and  $MM_{3co}$  model (color-coded) are presented with mean residuals and fits, as well as the GABA,  $MM_{3co}$ , homocarnosine (HCar) and spline baseline models. The mean data is included in black. The arrows indicate the range of values for a specific modeling range and spline knot spacing with the color corresponding to the  $MM_{3co}$  model with minimum/maximum value.

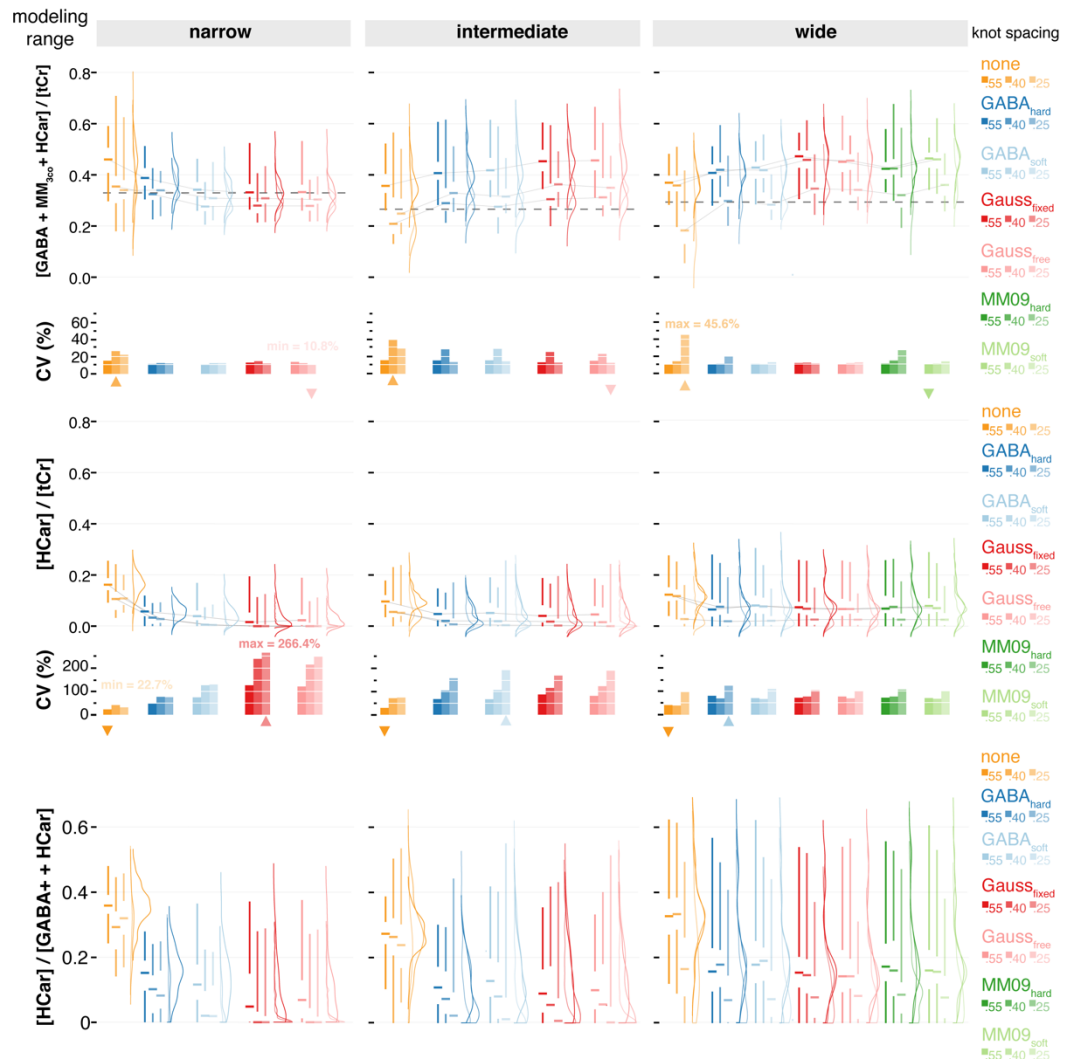

Supplementary Material 7 - Distribution of GABA+ plus HCar and HCar estimates and the relative contribution of HCar to GABA+ plus HCar for all modeling strategies. The mean estimates of GABA+ plus HCar across the three spline knot spacings of the 'none' approach are indicated as a dashed line for each modeling range. All three modeling ranges (column) and three spline knot spacings (within each column), and  $MM_{3co}$  models (color-coded) are presented. Distributions are shown as half-violins

*(smoothed distribution), box plots with median, interquartile range, and 25<sup>th</sup>/75<sup>th</sup> quartile. The median lines of the box plots are connected to visualize trends within a specific baseline knot spacing. CVs are summarized as bar plots. Minimum/maximum CVs for each spline knot spacing are indicated as downwards/upwards triangle in the color corresponding to the MM<sub>3co</sub> model. Global minimum and maximum CVs across all models are added as text.*



## **Declaration of competing interests**

The authors have nothing to declare.

## **Acknowledgement**

This work is supported by NIH grants P41 EB031771, R01 EB016089, R01 EB023963, R01 EB028259, R21 AG060245, and K99/R00 AG062230.

## **CRediT authorship contribution statement**

**Helge J. Zöllner:** Software, Formal Analysis, Investigation, Writing – Original Draft, Writing – Review & Editing, Visualization. **Sofie Tapper:** Investigation, Writing – Review & Editing. **Steve C. N. Hui:** Investigation, Writing – Review & Editing. **Richard A. E. Edden:** Conceptualization, Formal Analysis, Writing – Review & Editing, Supervision, Project administration, Funding acquisition. **Peter B. Barker:** Writing – Review & Editing, Supervision, Funding acquisition. **Georg Oeltzschner:** Conceptualization, Methodology, Software, Investigation, Formal Analysis, Writing – Review & Editing, Supervision, Funding acquisition.
